# Supplementary material for: Dihydroagarofuran sesquiterpenoid derivatives from the leaves of Tripterygium wilfordii with potential neuroprotective effects against H2O2-induced SH-SY5Y cell injuries
Source: Royal Society of Chemistry journal article supplement (doi:10.1039/d0nj00703j), 2020-01-01
Supplement: d0nj00703j1.pdf [file d0nj00703j1.pdf]

Electronic Supplementary Information (ESI) for New Journal of Chemistry

**Dihydroagarofuran Sesquiterpenoid Derivatives from the  
Leaves of *Tripterygium wilfordii* with potential  
neuroprotective effects against H<sub>2</sub>O<sub>2</sub>-induced SH-SY5Y cell  
injury**

Shu-Hui Dong<sup>a</sup>, Ming Bai<sup>a</sup>, Zi-Lin Hou<sup>a</sup>, Wei-Yu Zhou<sup>a</sup>, Guo-Dong Yao<sup>a</sup>, Bin Lin<sup>b</sup>,  
Xiao-Xiao Huang<sup>a\*</sup>, Shao-Jiang Song<sup>a\*</sup>

<sup>a</sup> *Key Laboratory of Computational Chemistry-Based Natural Antitumor Drug  
Research & Development, Liaoning Province, School of Traditional Chinese Materia  
Medica, Shenyang Pharmaceutical University, Shenyang 110016, China*

<sup>b</sup> *School of Pharmaceutical Engineering, Shenyang Pharmaceutical University,  
Shenyang 110016, People's Republic of China*

\*Corresponding author.

E-mail addresses: songsj99@163.com. (S.-J. Song)

E-mail addresses: xiaoxiao270@163.com (X.-X. Huang)

## List of supplementary content

- Fig. S1.1** HRESIMS spectrum of compound **1**
- Fig. S1.2** UV spectrum of compound **1**
- Fig. S1.3**  $^1\text{H}$  NMR spectrum (600 MHz,  $\text{CDCl}_3$ ) of compound **1**
- Fig. S1.4**  $^{13}\text{C}$  NMR spectrum (150 MHz,  $\text{CDCl}_3$ ) of compound **1**
- Fig. S1.5** HSQC spectrum (600 MHz,  $\text{CDCl}_3$ ) of compound **1**
- Fig. S1.6** HMBC spectrum (600 MHz,  $\text{CDCl}_3$ ) of compound **1**
- Fig. S1.7** NOESY spectrum (600 MHz,  $\text{CDCl}_3$ ) of compound **1**
- Fig. S1.8** Most stable conformers of **1** in solvated model calculations at the B3LYP/6-311++G (2d, p) level in ECD calculation
- Fig. S1.9**  $^1\text{H}$  NMR spectrum (600 MHz, DMSO) of compound **1**
- Fig. S1.10**  $^1\text{H}$ - $^1\text{H}$  COSY spectrum (600 MHz, DMSO) of compound **1**
- Fig. S2.1** HRESIMS spectrum of compound **2**
- Fig. S2.2** UV spectrum of compound **2**
- Fig. S2.3**  $^1\text{H}$  NMR spectrum (600 MHz,  $\text{CDCl}_3$ ) of compound **2**
- Fig. S2.4**  $^{13}\text{C}$  NMR spectrum (150 MHz,  $\text{CDCl}_3$ ) of compound **2**
- Fig. S2.5** HSQC spectrum (600 MHz,  $\text{CDCl}_3$ ) of compound **2**
- Fig. S2.6** HMBC spectrum (600 MHz,  $\text{CDCl}_3$ ) of compound **2**
- Fig. S2.7** NOESY spectrum (600 MHz,  $\text{CDCl}_3$ ) of compound **2**
- Fig. S2.8** Most stable conformers of **2** in solvated model calculations at the B3LYP/6-311++G (2d, p) level in ECD calculation
- Fig. S2.9**  $^1\text{H}$  NMR spectrum (600 MHz, DMSO) of compound **2**
- Fig. S2.10**  $^1\text{H}$ - $^1\text{H}$  COSY spectrum (600 MHz, DMSO) of compound **2**
- Fig. S3.1** HRESIMS spectrum of compound **3**
- Fig. S3.2** UV spectrum of compound **3**
- Fig. S3.3**  $^1\text{H}$  NMR spectrum (600 MHz,  $\text{CDCl}_3$ ) of compound **3**
- Fig. S3.4**  $^{13}\text{C}$  NMR spectrum (150 MHz,  $\text{CDCl}_3$ ) of compound **3**
- Fig. S3.5** HSQC spectrum (600 MHz,  $\text{CDCl}_3$ ) of compound **3**
- Fig. S3.6** HMBC spectrum (600 MHz,  $\text{CDCl}_3$ ) of compound **3**

**Fig. S3.7** NOESY spectrum (600 MHz, CDCl<sub>3</sub>) of compound **3**

**Fig. S3.8** Most stable conformers of **3** in solvated model calculations at the B3LYP/6-311++G (2d, p) level in ECD calculation

**Fig. S3.9** <sup>1</sup>H NMR spectrum (600 MHz, DMSO) of compound **3**

**Fig. S3.10** <sup>1</sup>H-<sup>1</sup>H COSY spectrum (600 MHz, DMSO) of compound **3**

**Fig. S4.1** HRESIMS spectrum of compound **4**

**Fig. S4.2** UV spectrum of compound **4**

**Fig. S4.3** <sup>1</sup>H NMR spectrum (600 MHz, CDCl<sub>3</sub>) of compound **4**

**Fig. S4.4** <sup>13</sup>C NMR spectrum (150 MHz, CDCl<sub>3</sub>) of compound **4**

**Fig. S4.5** HSQC spectrum (600 MHz, CDCl<sub>3</sub>) of compound **4**

**Fig. S4.6** HMBC spectrum (600 MHz, CDCl<sub>3</sub>) of compound **4**

**Fig. S4.7** NOESY spectrum (600 MHz, CDCl<sub>3</sub>) of compound **4**.

**Fig. S4.8** Most stable conformers of **4** in solvated model calculations at the B3LYP/6-311++G (2d, p) level in ECD calculation

**Fig. S4.9** <sup>1</sup>H NMR spectrum (600 MHz, DMSO) of compound **4**

**Fig. S4.10** <sup>1</sup>H-<sup>1</sup>H COSY spectrum (600 MHz, DMSO) of compound **4**

**Fig. S5.1** HRESIMS spectrum of compound **5**

**Fig. S5.2** UV spectrum of compound **5**

**Fig. S5.3** <sup>1</sup>H NMR spectrum (600 MHz, CDCl<sub>3</sub>) of compound **5**

**Fig. S5.4** <sup>13</sup>C NMR spectrum (150 MHz, CDCl<sub>3</sub>) of compound **5**

**Fig. S5.5** HSQC spectrum (600 MHz, CDCl<sub>3</sub>) of compound **5**

**Fig. S5.6** HMBC spectrum (600 MHz, CDCl<sub>3</sub>) of compound **5**

**Fig. S5.7** NOESY spectrum (600 MHz, CDCl<sub>3</sub>) of compound **5**

**Fig. S5.8** Most stable conformers of **5** in solvated model calculations at the B3LYP/6-311++G (2d, p) level in ECD calculation

**Fig. S5.9** <sup>1</sup>H NMR spectrum (600 MHz, DMSO) of compound **5**

**Fig. S5.10** <sup>1</sup>H-<sup>1</sup>H COSY spectrum (600 MHz, DMSO) of compound **5**

**Fig. S6.1** HRESIMS spectrum of compound **6**

**Fig. S6.2** UV spectrum of compound **6**

**Fig. S6.3** <sup>1</sup>H NMR spectrum (600 MHz, CDCl<sub>3</sub>) of compound **6**

**Fig. S6.4**  $^{13}\text{C}$  NMR spectrum (150 MHz,  $\text{CDCl}_3$ ) of compound **6**

**Fig. S6.5** HSQC spectrum (600 MHz,  $\text{CDCl}_3$ ) of compound **6**

**Fig. S6.6** HMBC spectrum (600 MHz,  $\text{CDCl}_3$ ) of compound **6**

**Fig. S6.7** NOESY spectrum (600 MHz,  $\text{CDCl}_3$ ) of compound **6**

**Fig. S6.8** Most stable conformers of **6** in solvated model calculations at the B3LYP/6-311++G (2d, p) level in ECD calculation

**Fig. S6.9**  $^1\text{H}$  NMR spectrum (600 MHz, DMSO) of compound **6**

**Fig. S6.10**  $^1\text{H}$ - $^1\text{H}$  COSY spectrum (600 MHz, DMSO) of compound **6**

**Fig. S7.1** HRESIMS spectrum of compound **7**

**Fig. S7.2** UV spectrum of compound **7**

**Fig. S7.3**  $^1\text{H}$  NMR spectrum (600 MHz,  $\text{CDCl}_3$ ) of compound **7**

**Fig. S7.4**  $^{13}\text{C}$  NMR spectrum (150 MHz,  $\text{CDCl}_3$ ) of compound **7**

**Fig. S7.5** HSQC spectrum (600 MHz,  $\text{CDCl}_3$ ) of compound **7**

**Fig. S7.6** HMBC spectrum (600 MHz,  $\text{CDCl}_3$ ) of compound **7**

**Fig. S7.7** NOESY spectrum (600 MHz,  $\text{CDCl}_3$ ) of compound **7**

**Fig. S7.8** Most stable conformers of **7** in solvated model calculations at the B3LYP/6-311++G (2d, p) level in ECD calculation

**Fig. S7.9**  $^1\text{H}$  NMR spectrum (600 MHz, DMSO) of compound **7**

**Fig. S7.10**  $^1\text{H}$ - $^1\text{H}$  COSY spectrum (600 MHz, DMSO) of compound **7**

**Fig. S8.1** HRESIMS spectrum of compound **8**

**Fig. S8.2** UV spectrum of compound **8**

**Fig. S8.3**  $^1\text{H}$  NMR spectrum (600 MHz,  $\text{CDCl}_3$ ) of compound **8**

**Fig. S8.4**  $^{13}\text{C}$  NMR spectrum (150 MHz,  $\text{CDCl}_3$ ) of compound **8**

**Fig. S8.5** HSQC spectrum (600 MHz,  $\text{CDCl}_3$ ) of compound **8**

**Fig. S8.6** HMBC spectrum (600 MHz,  $\text{CDCl}_3$ ) of compound **8**

**Fig. S8.7** NOESY spectrum (600 MHz,  $\text{CDCl}_3$ ) of compound **8**

**Fig. S8.8** Most stable conformers of **8** in solvated model calculations at the B3LYP/6-311++G (2d, p) level in ECD calculation

**Fig. S8.9**  $^1\text{H}$  NMR spectrum (600 MHz, DMSO) of compound **8**

**Fig. S8.10**  $^1\text{H}$ - $^1\text{H}$  COSY spectrum (600 MHz, DMSO) of compound **8**

**Analysis Info**  
 Analysis Name D:\Data\20190320ceyang\DL-6\_1-C\_8\_01\_13234.d  
 Method 20180614yezhi.m  
 Sample Name DLD-6  
 Comment  
 Acquisition Date 3/20/2019 1:08:35 PM  
 Operator Bruker Customer  
 Instrument / Ser# micrOTOF-Q 125

**Acquisition Parameter**  
 Source Type ESI Ion Polarity Positive Set Nebulizer 0.4 Bar  
 Focus Active Set Capillary 4500 V Set Dry Heater 180 °C  
 Scan Begin 50 m/z Set End Plate Offset -500 V Set Dry Gas 4.0 l/min  
 Scan End 3000 m/z Set Collision Cell RF 600.0 Vpp Set Divert Valve Waste

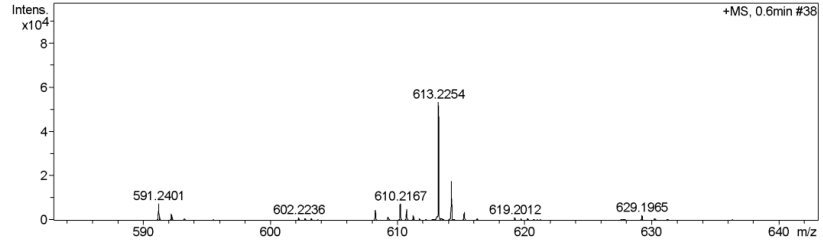

| Meas. #  | Formula                                           | m/z      | err [ppm] | Mean err [ppm] | rdb  | N-Rule | e <sup>-</sup> Conf | mSigma | Std I  | Std Mean | Std Var | Std No | Std m/z | Std Diff | Std Comb Dev |
|----------|---------------------------------------------------|----------|-----------|----------------|------|--------|---------------------|--------|--------|----------|---------|--------|---------|----------|--------------|
| 613.2254 | 1 C <sub>30</sub> H <sub>38</sub> O <sub>12</sub> | 613.2255 | 0.3       | 1.3            | 11.5 | ok     | even                | 5.51   | 0.0103 | 0.0013   | 0.0041  | 0.0021 | 0.8427  |          |              |

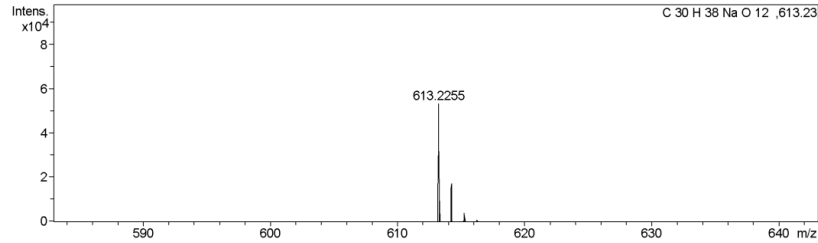

| Meas. #  | Formula                                           | m/z      | err [ppm] | Mean err [ppm] | rdb | N-Rule | e <sup>-</sup> Conf | mSigma | Std I | Std Mean | Std Var | Std No | Std m/z | Std Diff | Std Comb Dev |
|----------|---------------------------------------------------|----------|-----------|----------------|-----|--------|---------------------|--------|-------|----------|---------|--------|---------|----------|--------------|
| 613.2255 | C <sub>30</sub> H <sub>38</sub> NaO <sub>12</sub> | 613.2255 |           |                |     |        |                     |        |       |          |         |        |         |          |              |

**Fig. S1.1** HRESIMS spectrum of compound **1**

### Spectrum Peak Pick Report

FIELD FIELD TEXT

Data Set: 没有

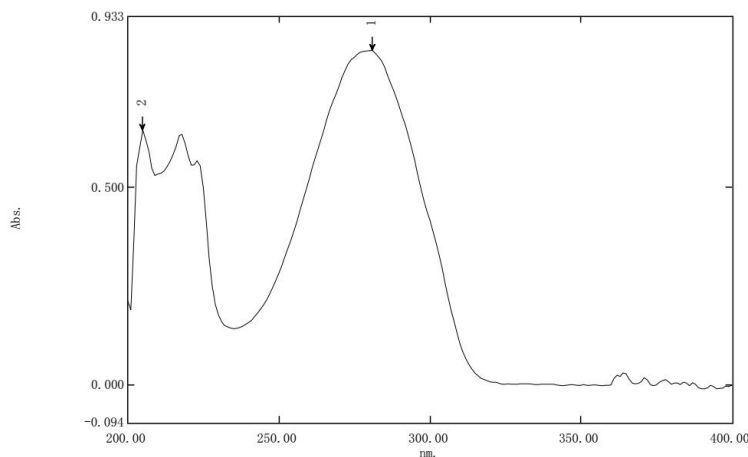

测定属性  
 波长范围 (nm.): 200.00到400.00  
 扫描速度: 中速  
 采样间隔: 1.0  
 自动采样间隔: 停用  
 扫描模式: 单一的

| No. | P/V | Wavelength | Abs. | 描述 |
|-----|-----|------------|------|----|
| 1   | ●   | 281.00     | .847 |    |
| 2   | ●   | 205.00     | .645 |    |
| 3   | ●   | 235.00     | .143 |    |
| 4   | ●   | 209.00     | .531 |    |

**Fig. S1.2** UV spectrum of compound **1**

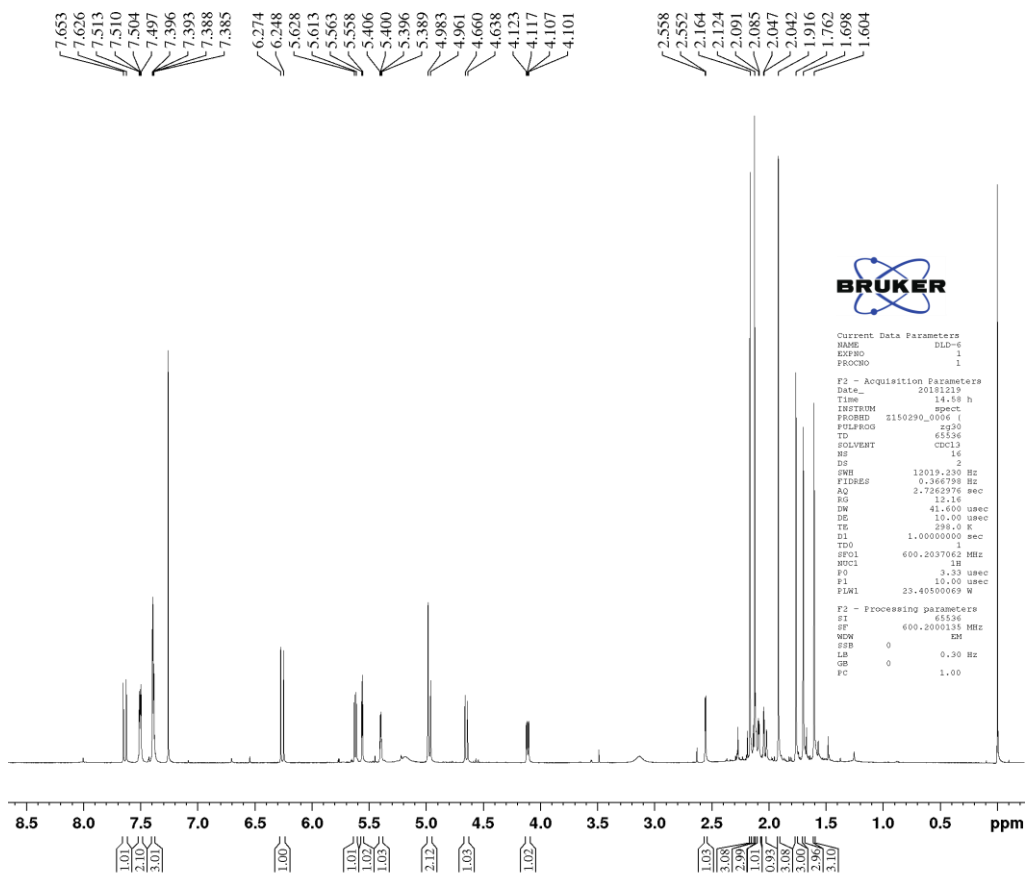

Fig. S1.3  $^1\text{H}$  NMR spectrum (600 MHz,  $\text{CDCl}_3$ ) of compound 1

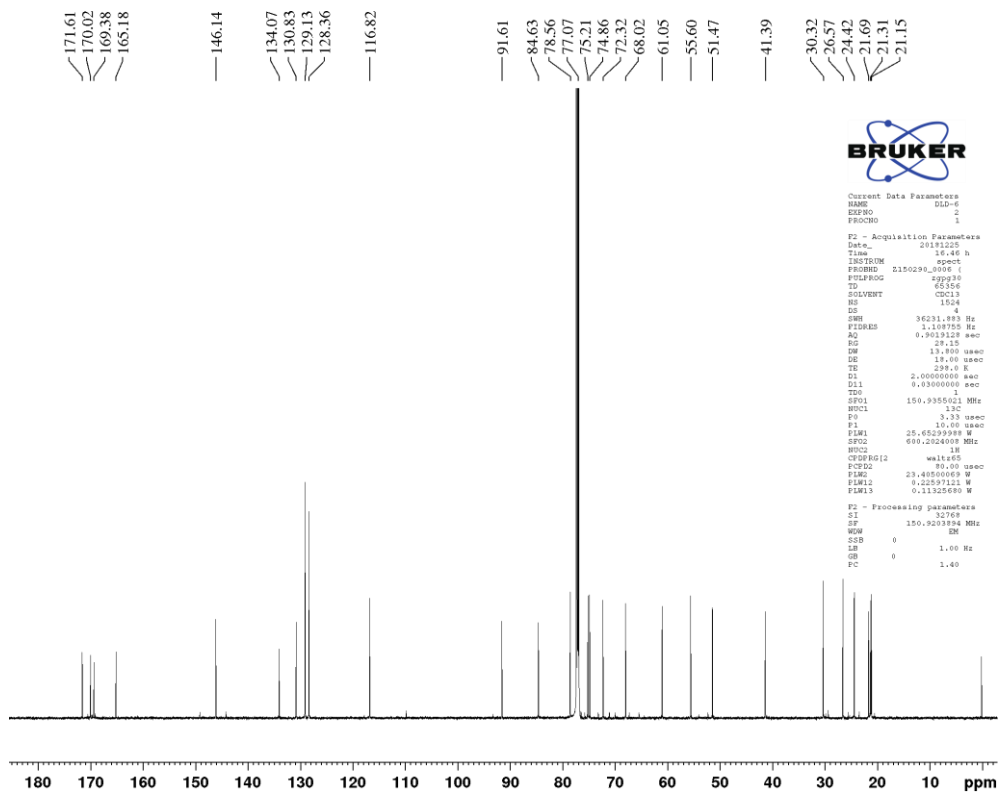

Fig. S1.4  $^{13}\text{C}$  NMR spectrum (150 MHz,  $\text{CDCl}_3$ ) of compound 1

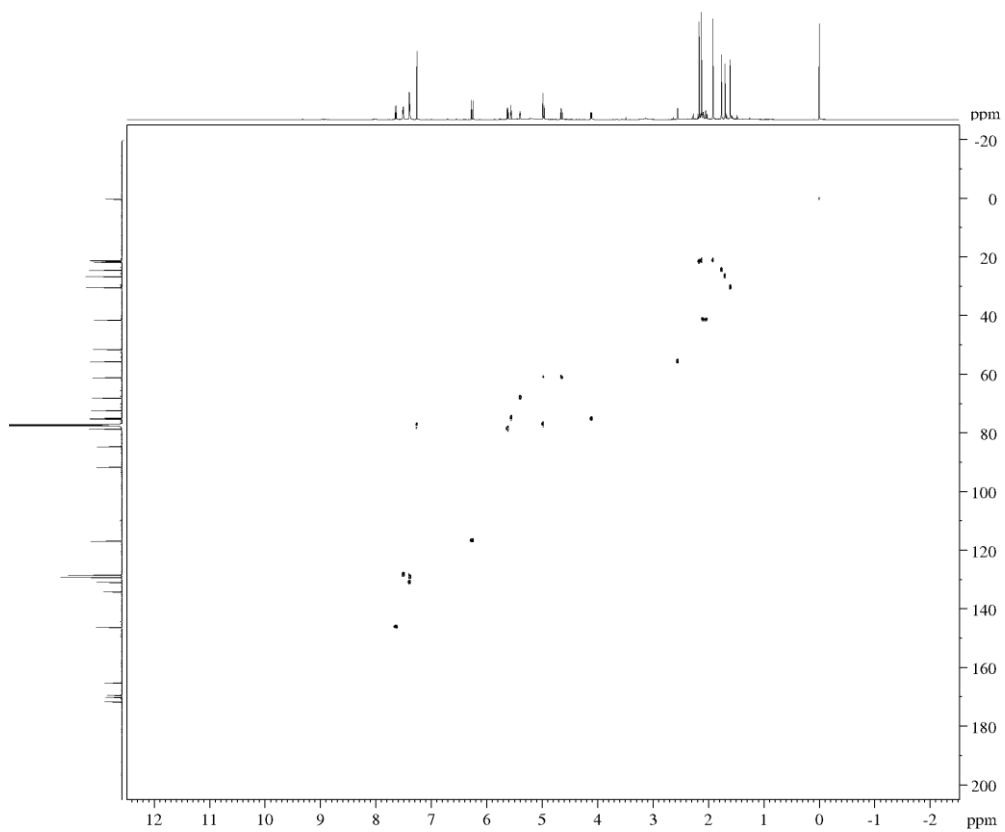

**Fig. S1.5** HSQC spectrum (600 MHz, CDCl<sub>3</sub>) of compound **1**

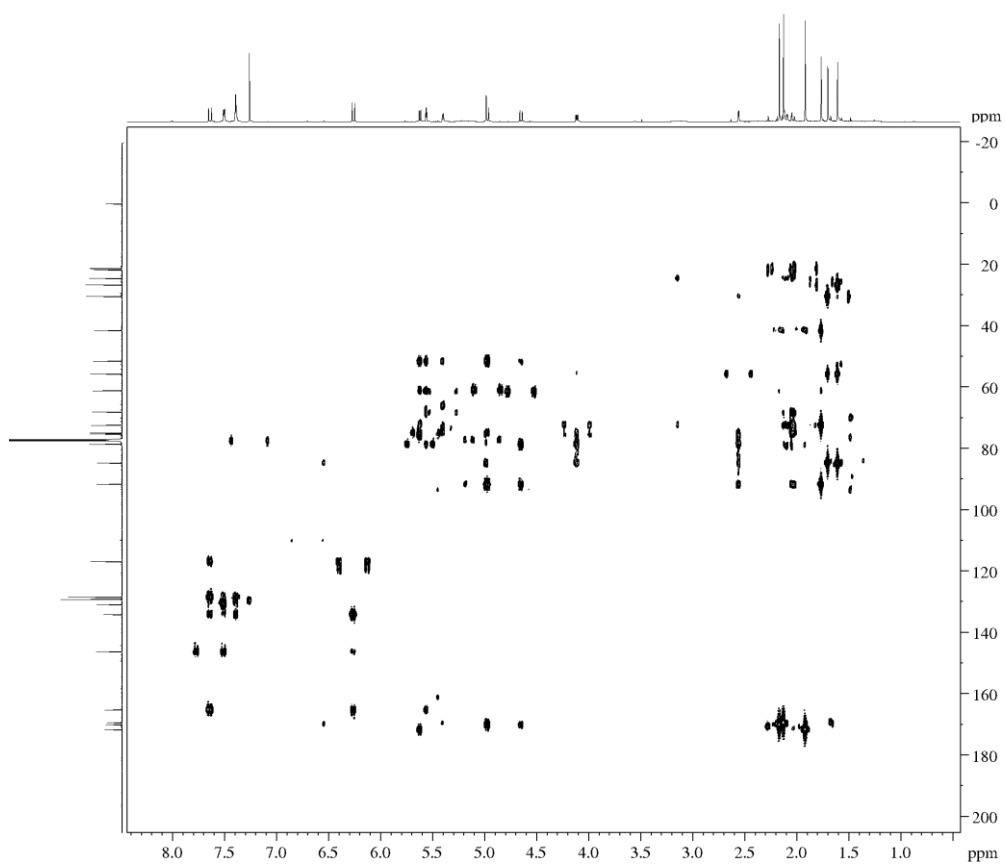

**Fig. S1.6** HMBC spectrum (600 MHz, CDCl<sub>3</sub>) of compound **1**

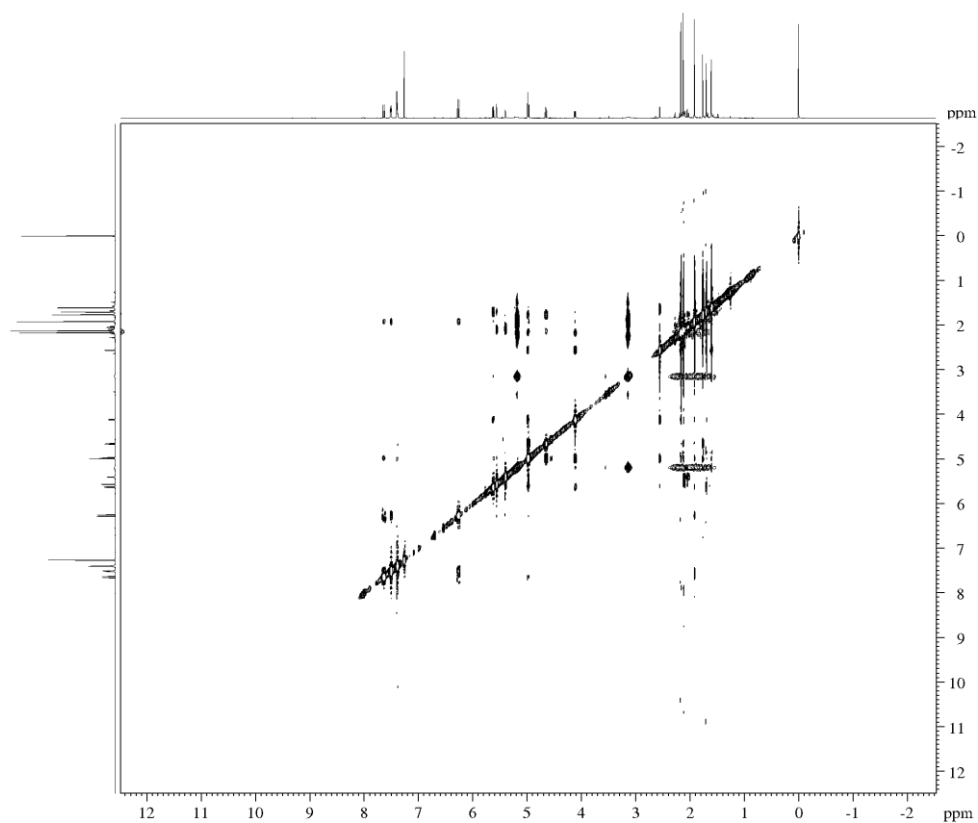

**Fig. S1.7** NOESY spectrum (600 MHz,  $\text{CDCl}_3$ ) of compound **1**

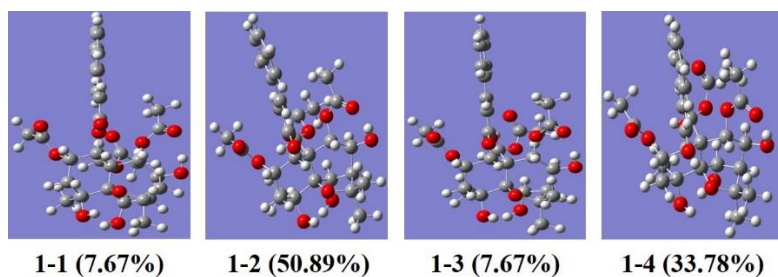

**Fig. S1.8** Most stable conformers of **1** in solvated model calculations at the B3LYP/6-311++G (2d, p) level in ECD calculation



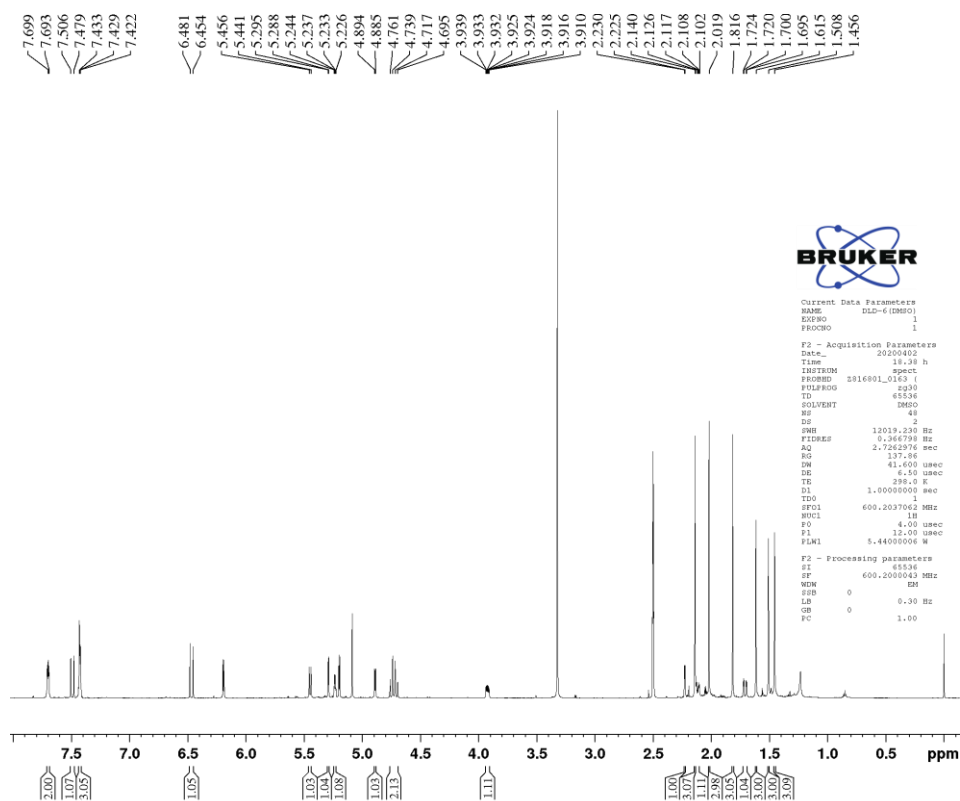

Fig. S1.9  $^1\text{H}$  NMR spectrum (600 MHz, DMSO) of compound 1

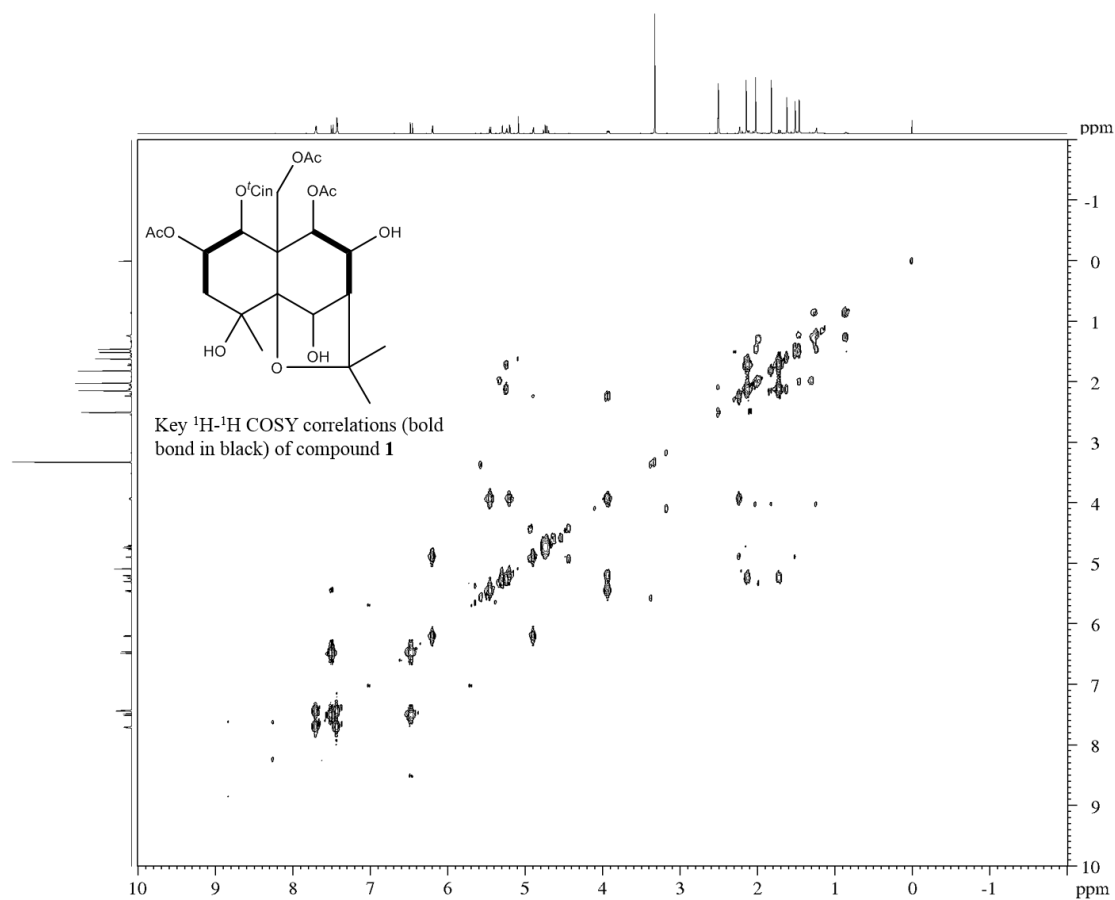

Fig. S1.10  $^1\text{H}$ - $^1\text{H}$  COSY spectrum (600 MHz, DMSO) of compound 1

**Analysis Info**  
 Analysis Name D:\Data\20190320ceyang\DLDD-1\_1-D,1\_01\_13236.d Acquisition Date 3/20/2019 1:16:02 PM  
 Method 20180614yezhi.m Operator Bruker Customer  
 Sample Name DLD-1 Instrument / Ser# microTOF-Q 125  
 Comment

**Acquisition Parameter**  
 Source Type ESI Ion Polarity Positive Set Nebulizer 0.4 Bar  
 Focus Active Set Capillary 4500 V Set Dry Heater 180 °C  
 Scan Begin 50 m/z Set End Plate Offset -500 V Set Dry Gas 4.0 l/min  
 Scan End 3000 m/z Set Collision Cell RF 600.0 Vpp Set Divert Valve Waste

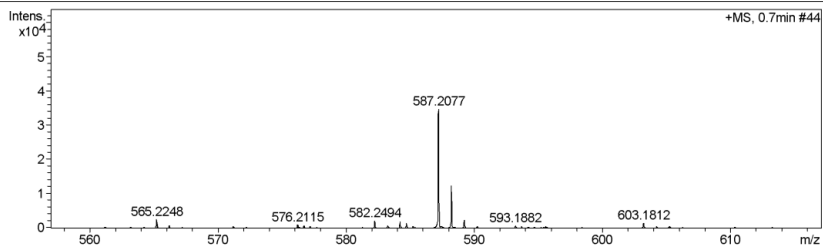

| Meas. #  | Formula                                             | m/z      | err [ppm] | Mean err [ppm] | rdb  | N-Rule | e <sup>-</sup> Conf | mSigma | Std I  | Std Mean m/z | Std I VarNo | Std m/z Diff | Std Comb Dev |
|----------|-----------------------------------------------------|----------|-----------|----------------|------|--------|---------------------|--------|--------|--------------|-------------|--------------|--------------|
| 587.2077 | 1 C <sub>28</sub> H <sub>36</sub> NaO <sub>12</sub> | 587.2099 | 3.8       | 4.8            | 10.5 | ok     | even                | 22.18  | 0.0323 | 0.0030       | 0.0106      | 0.0025       | 0.8427       |

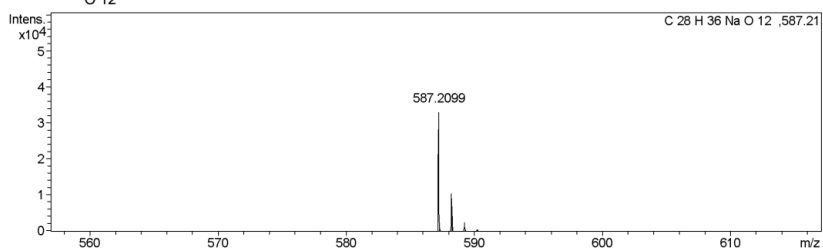

| Meas. #  | Formula                                           | m/z      | err [ppm] | Mean err [ppm] | rdb | N-Rule | e <sup>-</sup> Conf | mSigma | Std I | Std Mean m/z | Std I VarNo | Std m/z Diff | Std Comb Dev |
|----------|---------------------------------------------------|----------|-----------|----------------|-----|--------|---------------------|--------|-------|--------------|-------------|--------------|--------------|
| 587.2099 | C <sub>28</sub> H <sub>36</sub> NaO <sub>12</sub> | 587.2099 |           |                |     |        |                     |        |       |              |             |              |              |

**Fig. S2.1 HRESIMS spectrum of compound 2**

**Spectrum Peak Pick Report**

FIELD FIELD TEXT

Data Set: 没有

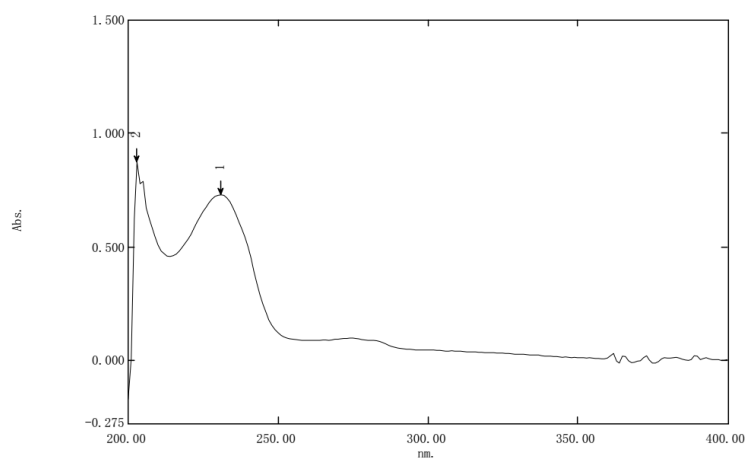

测定属性  
 波长范围 (nm.): 200.00到400.00  
 扫描速度: 中速  
 采样间隔: 1.0  
 自动采样间隔: 停用  
 扫描模式: 单一的

| No. | P/V | Wavelength | Abs. | 描述 |
|-----|-----|------------|------|----|
| 1   | ●   | 231.00     | .731 |    |
| 2   | ●   | 203.00     | .874 |    |
| 3   | ●   | 260.00     | .089 |    |
| 4   | ●   | 214.00     | .458 |    |

**Fig. S2.2 UV spectrum of compound 2**

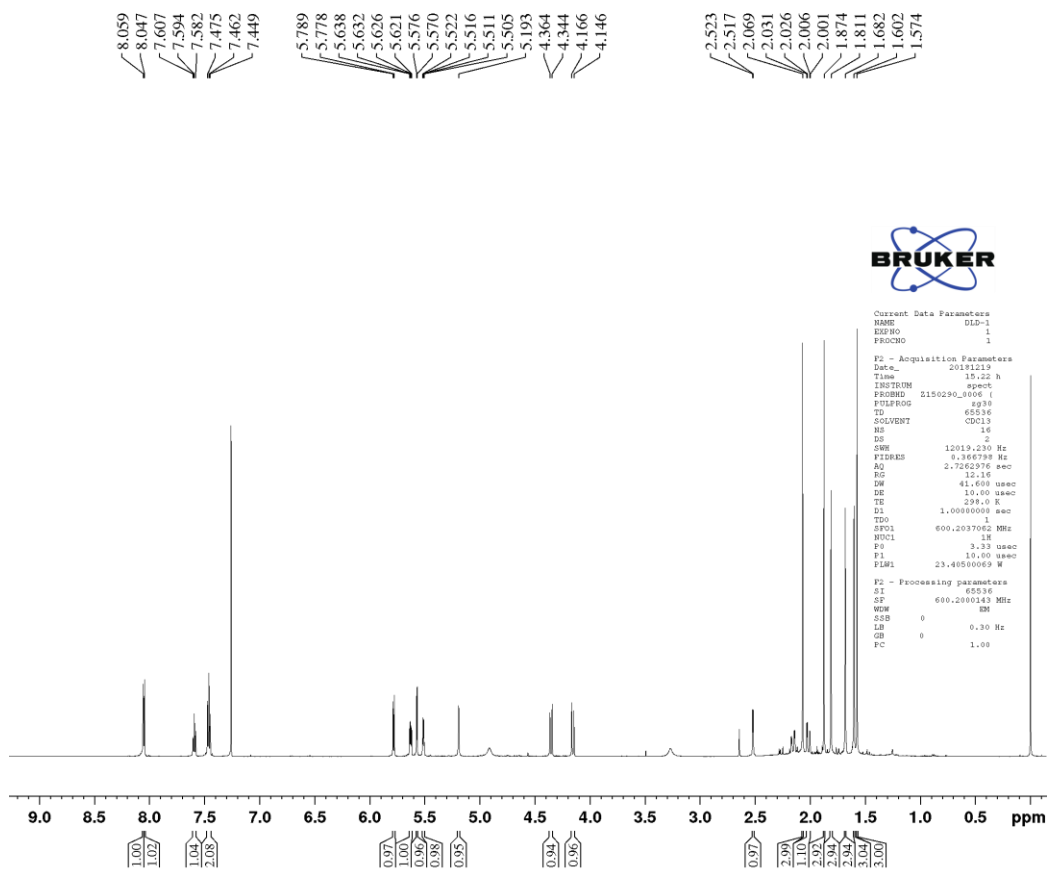

Fig. S2.3  $^1\text{H}$  NMR spectrum (600 MHz,  $\text{CDCl}_3$ ) of compound 2

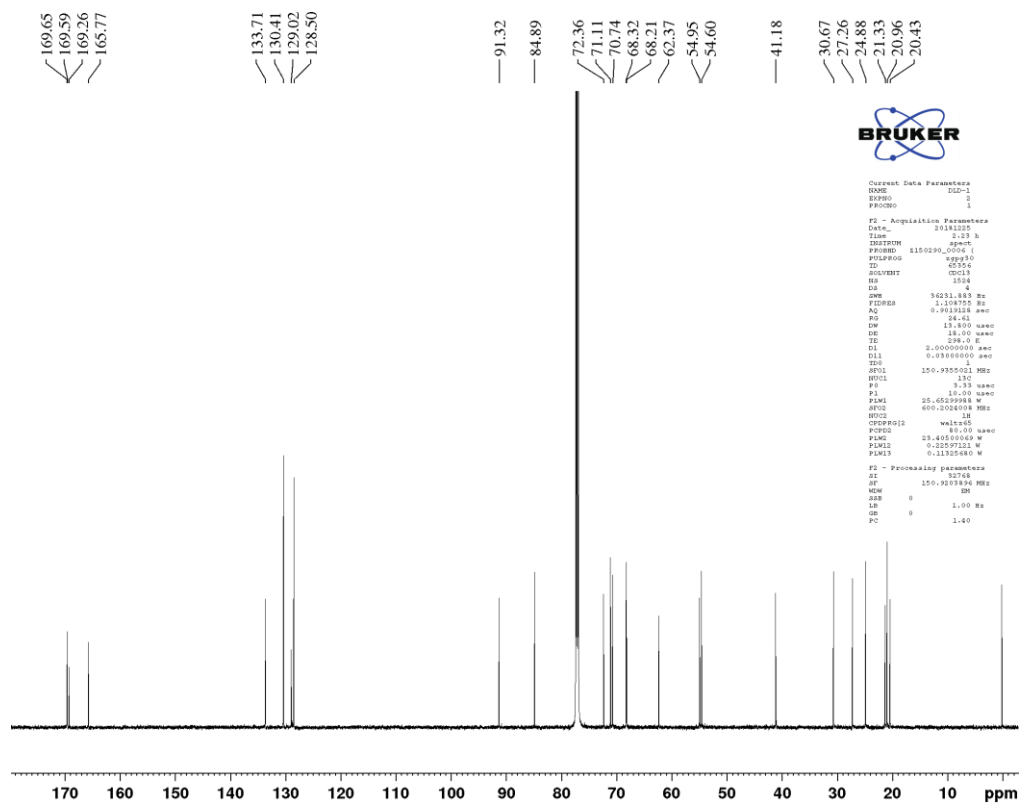

Fig. S2.4  $^{13}\text{C}$  NMR spectrum (150 MHz,  $\text{CDCl}_3$ ) of compound 2

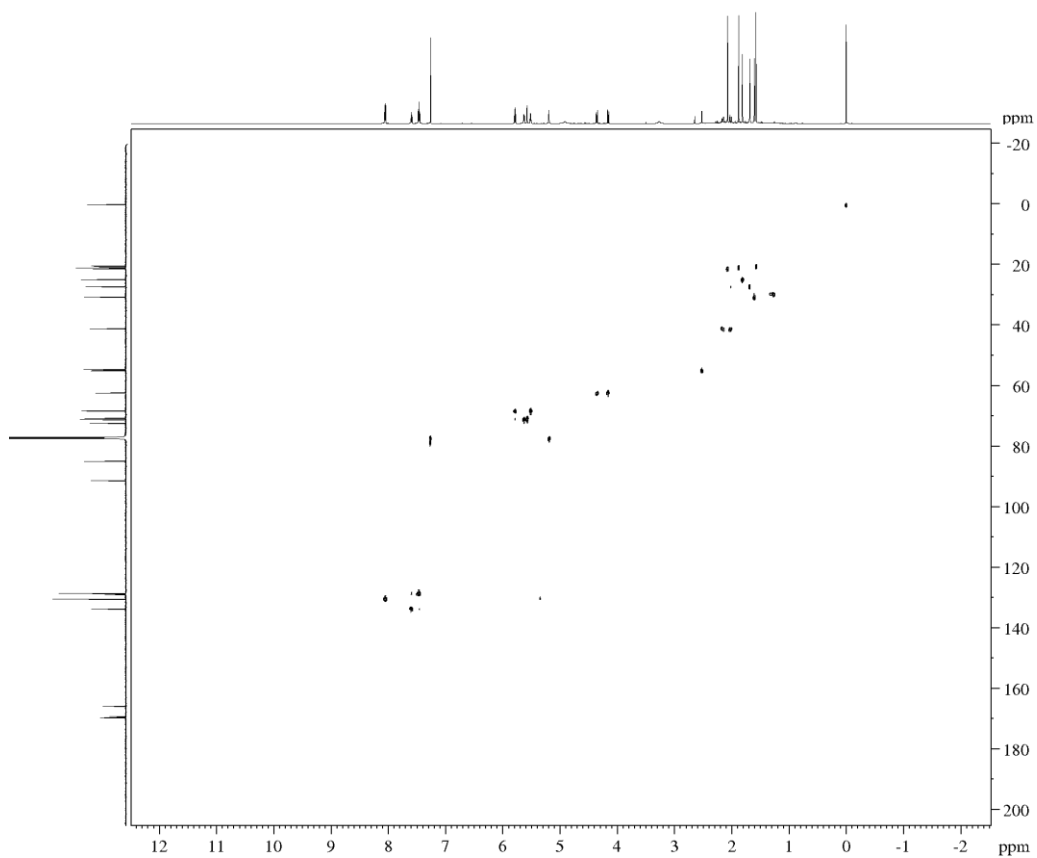

**Fig. S2.5** HSQC spectrum (600 MHz, CDCl<sub>3</sub>) of compound **2**

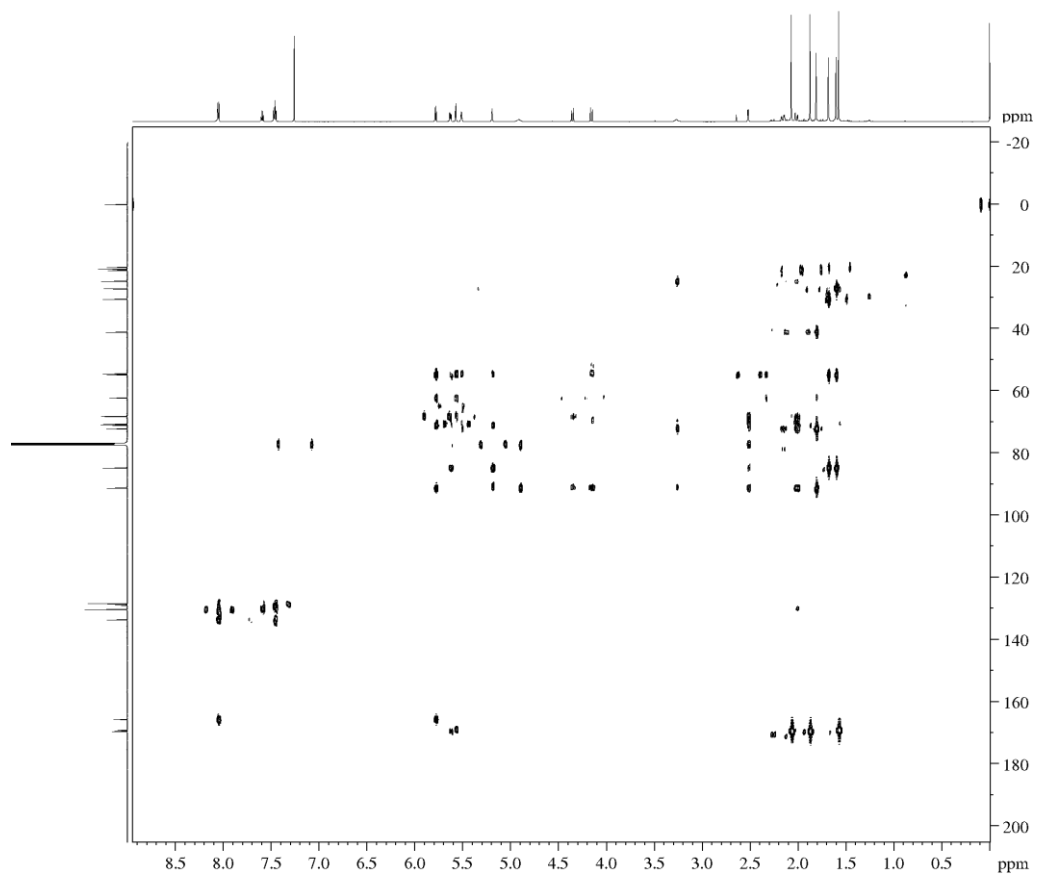

**Fig. S2.6** HMBC spectrum (600 MHz, CDCl<sub>3</sub>) of compound **2**

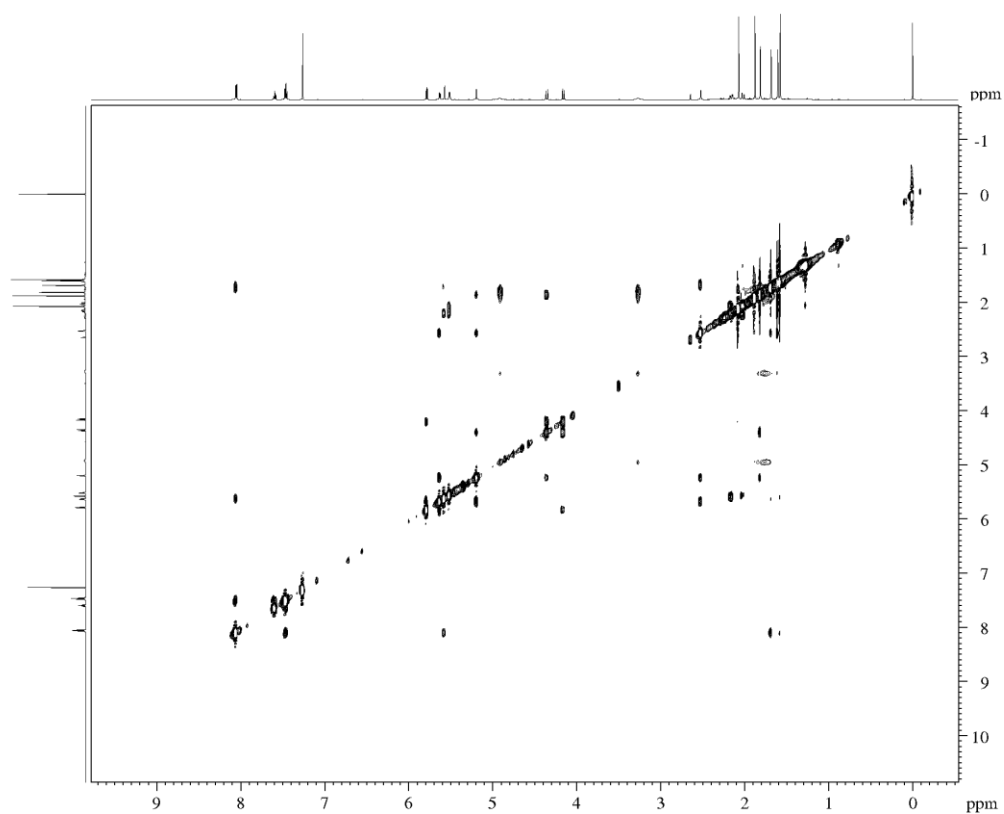

**Fig. S2.7** NOESY spectrum (600 MHz,  $\text{CDCl}_3$ ) of compound **2**

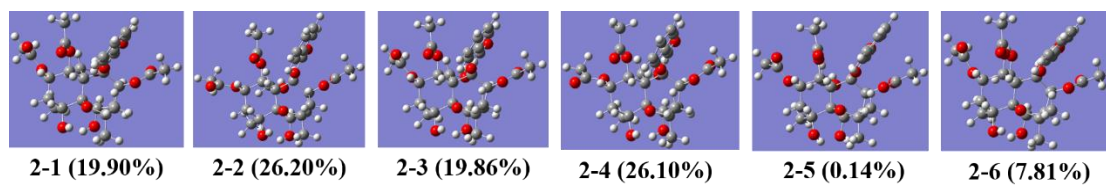

**Fig. S2.8** Most stable conformers of **2** in solvated model calculations at the B3LYP/6-311++G (2d, p) level in ECD calculation

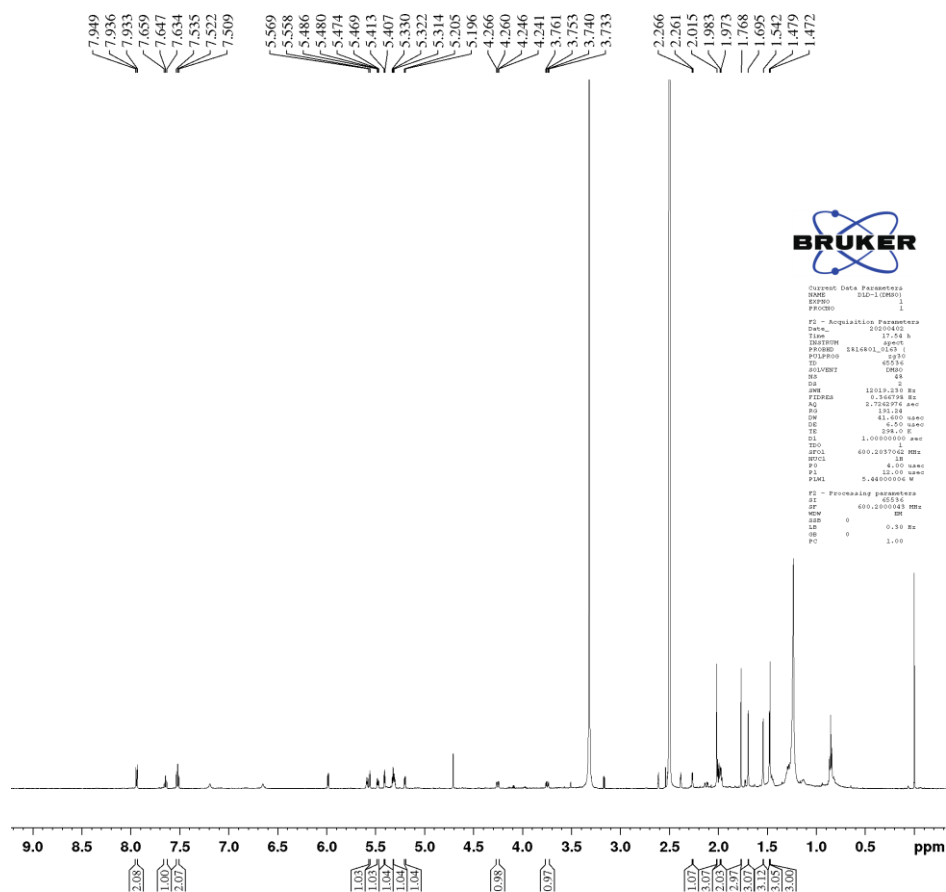

Fig. S2.9  $^1\text{H}$  NMR spectrum (600 MHz, DMSO) of compound **2**

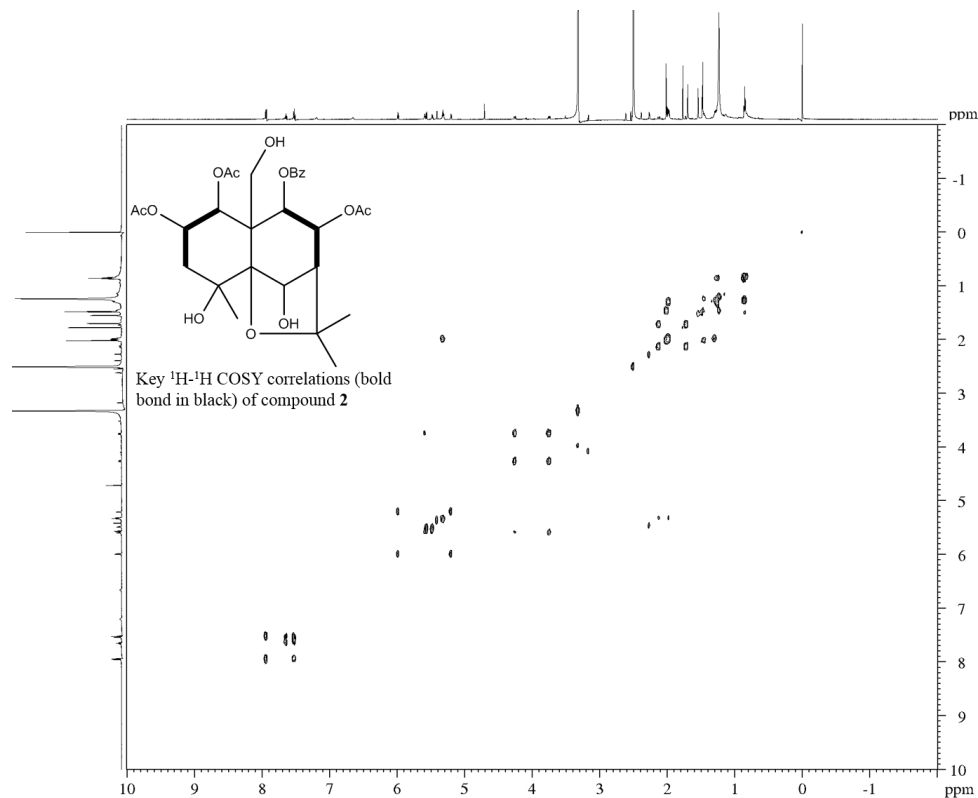

Fig. S2.10  $^1\text{H}$ - $^1\text{H}$  COSY spectrum (600 MHz, DMSO) of compound **2**

**Analysis Info**  
 Analysis Name: D:\Data\20190321-CEYANG\DL18\_1-F\_4\_01\_13318.d  
 Method: 20180614yezhi.m  
 Sample Name: DLD-18  
 Comment:  
 Acquisition Date: 3/21/2019 4:25:07 PM  
 Operator: Bruker Customer  
 Instrument / Ser#: micrOTOF-Q 125

**Acquisition Parameter**  
 Source Type: ESI  
 Focus: Active  
 Scan Begin: 50 m/z  
 Scan End: 1500 m/z  
 Ion Polarity: Positive  
 Set Capillary: 4500 V  
 Set End Plate Offset: -500 V  
 Set Collision Cell RF: 400.0 Vpp  
 Set Nebulizer: 1.2 Bar  
 Set Dry Heater: 180 °C  
 Set Dry Gas: 8.0 l/min  
 Set Divert Valve: Source

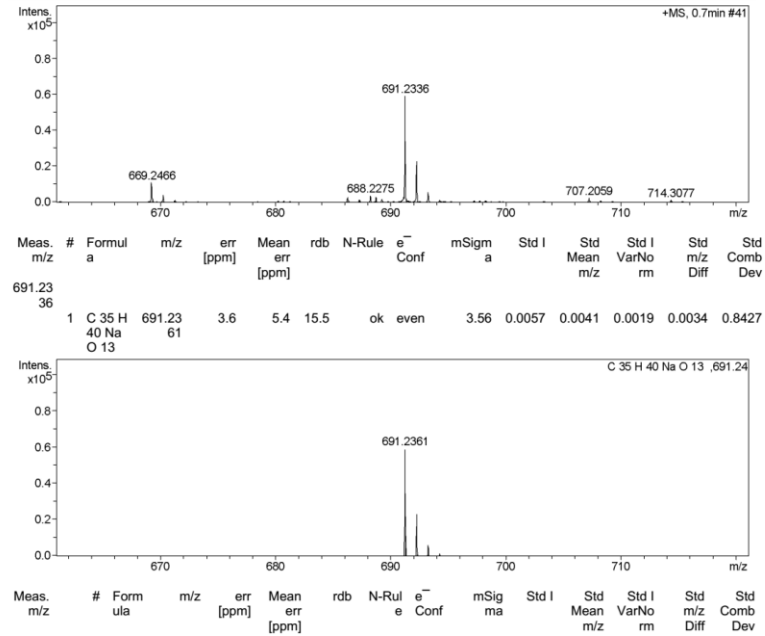

**Fig. S3.1** HRESIMS spectrum of compound **3**

**Spectrum Peak Pick Report**

FIELD FIELD TEXT

Data Set: 没有

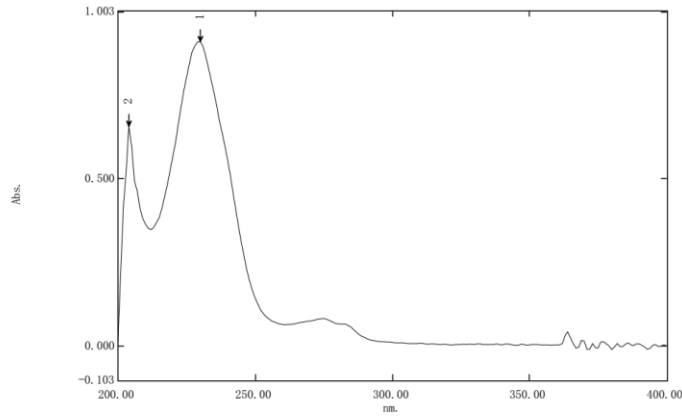

测定属性  
 波长范围 (nm.): 200.00到400.00  
 扫描速度: 中速  
 采样间隔: 1.0  
 自动采样间隔: 停用  
 扫描模式: 单一的

| No. | P/V | Wavelength | Abs. | 描述 |
|-----|-----|------------|------|----|
| 1   | ●   | 230.00     | .911 |    |
| 2   | ●   | 204.00     | .656 |    |
| 3   | ●   | 261.00     | .064 |    |
| 4   | ●   | 212.00     | .349 |    |

**Fig. S3.2** UV spectrum of compound **3**

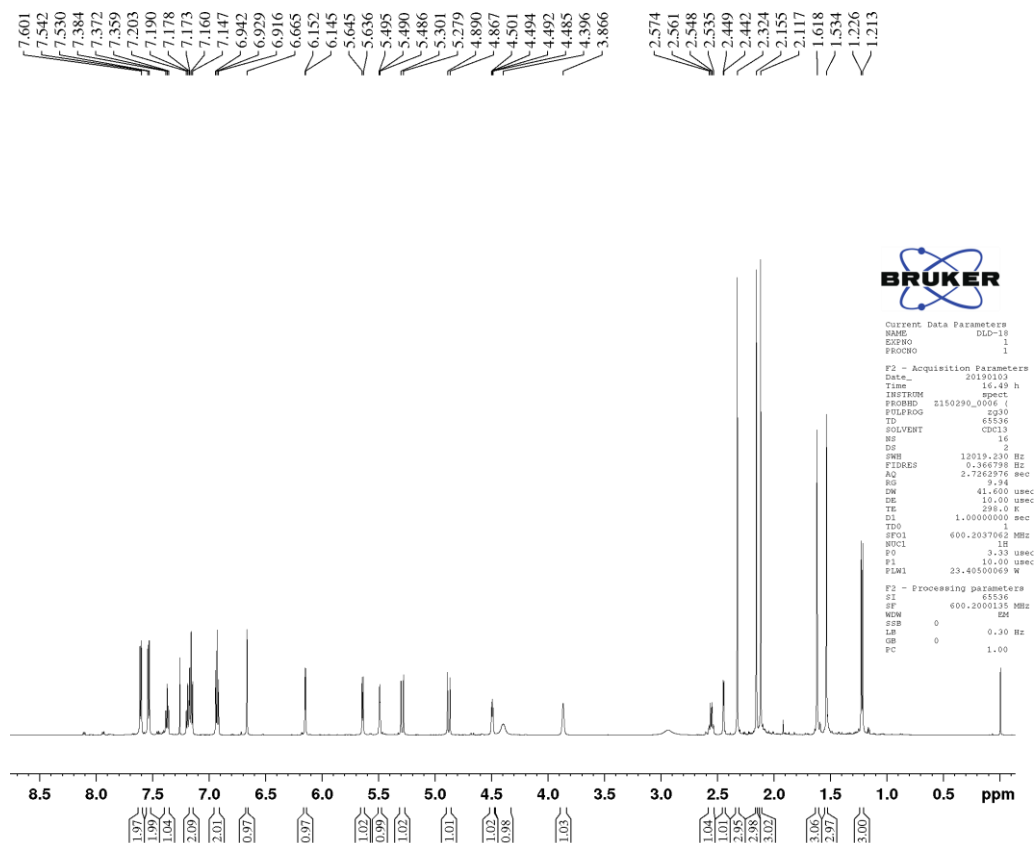

Fig. S3.3  $^1\text{H}$  NMR spectrum (600 MHz,  $\text{CDCl}_3$ ) of compound **3**

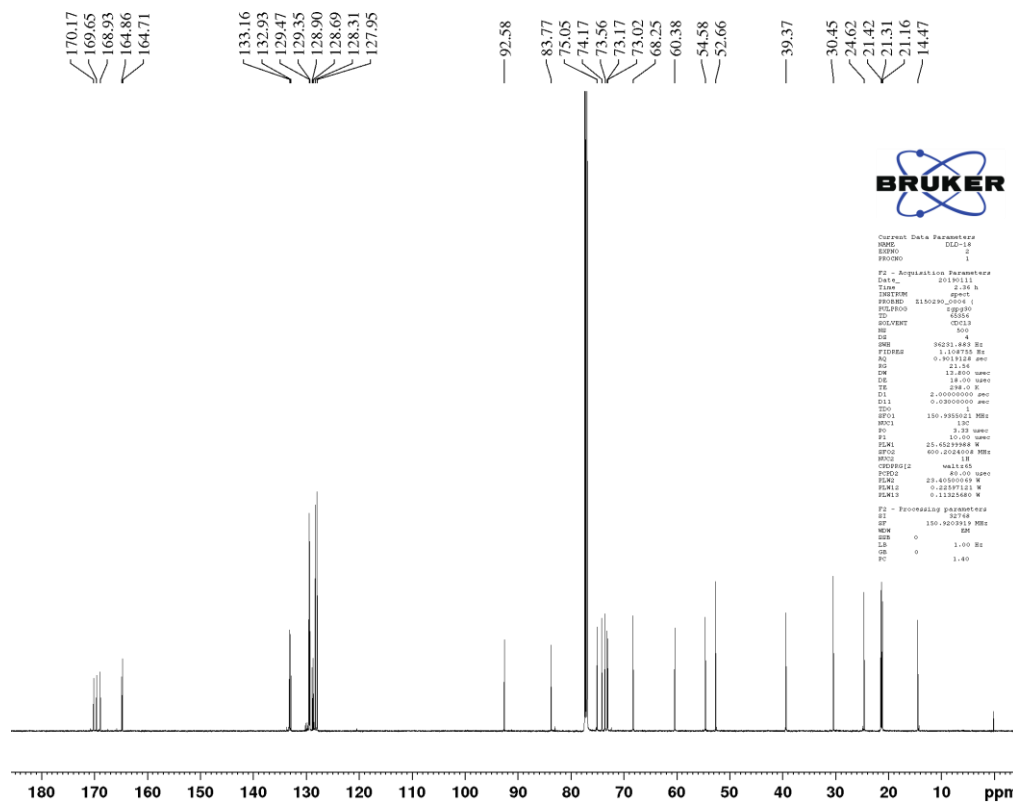

Fig. S3.4  $^{13}\text{C}$  NMR spectrum (150 MHz,  $\text{CDCl}_3$ ) of compound **3**



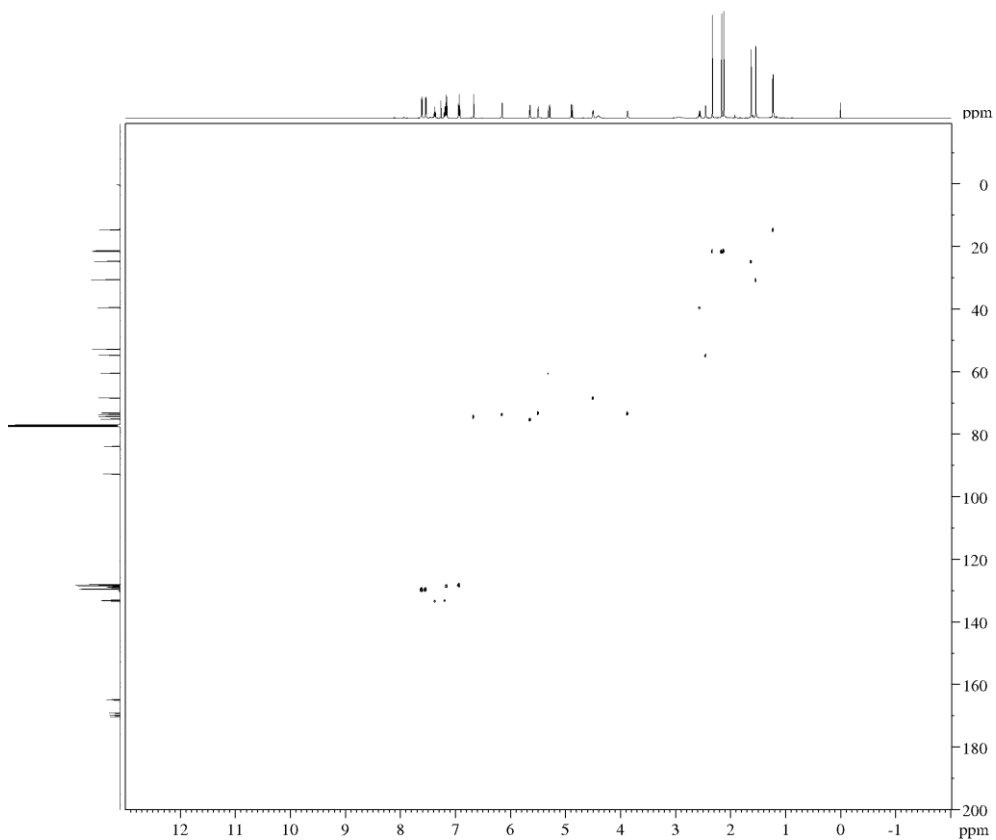

**Fig. S3.5** HSQC spectrum (600 MHz, CDCl<sub>3</sub>) of compound **3**

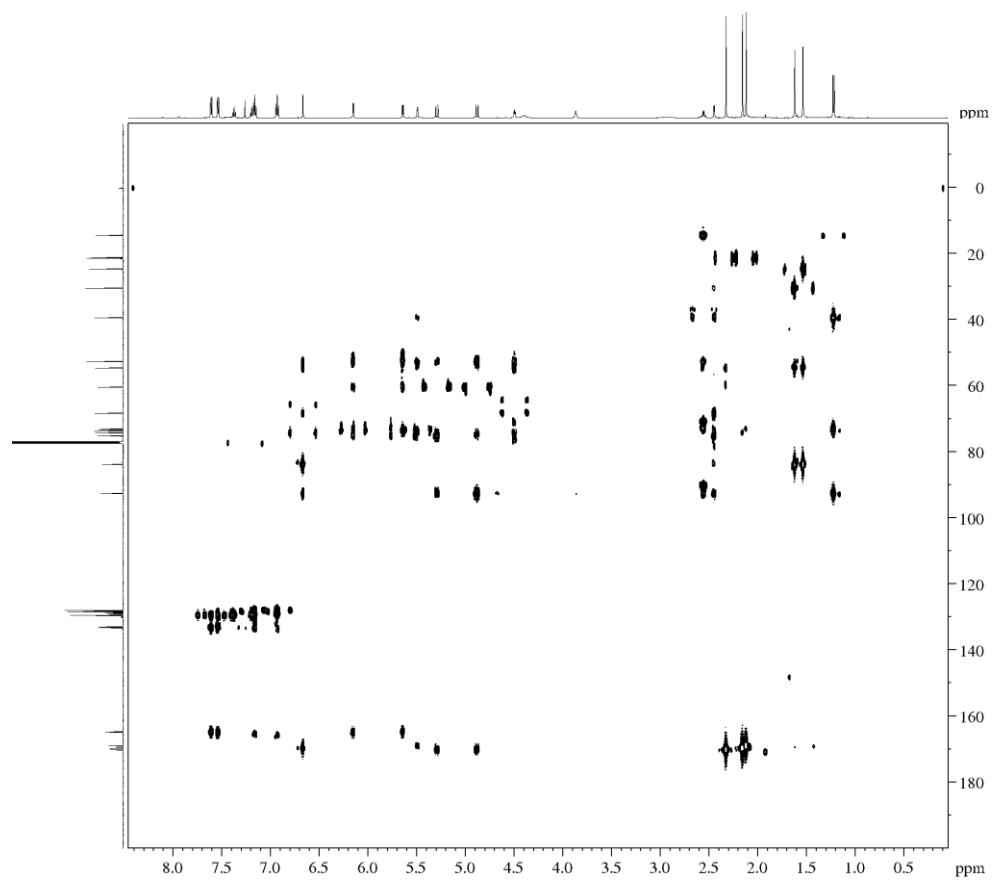

**Fig. S3.6** HMBC spectrum (600 MHz, CDCl<sub>3</sub>) of compound **3**

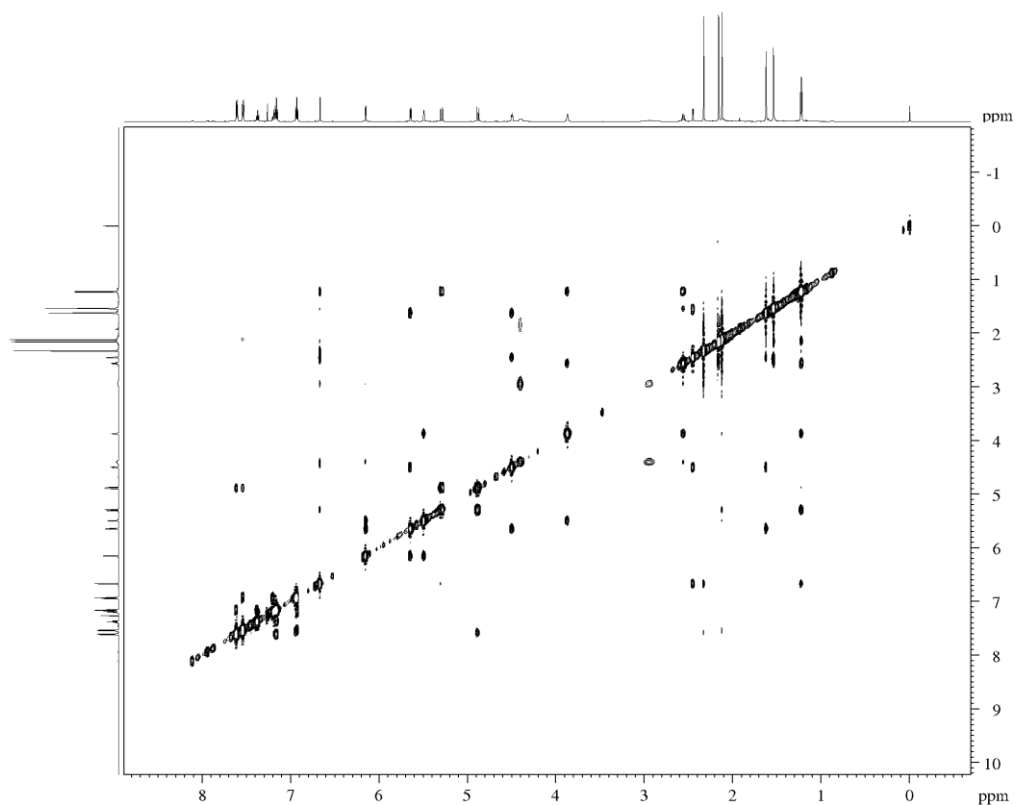

**Fig. S3.7** NOESY spectrum (600 MHz,  $\text{CDCl}_3$ ) of compound **3**

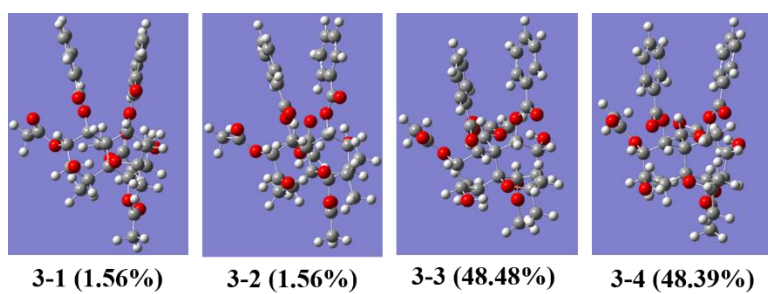

**Fig. S3.8** Most stable conformers of **3** in solvated model calculations at the B3LYP/6-311++G (2d, p) level in ECD calculation

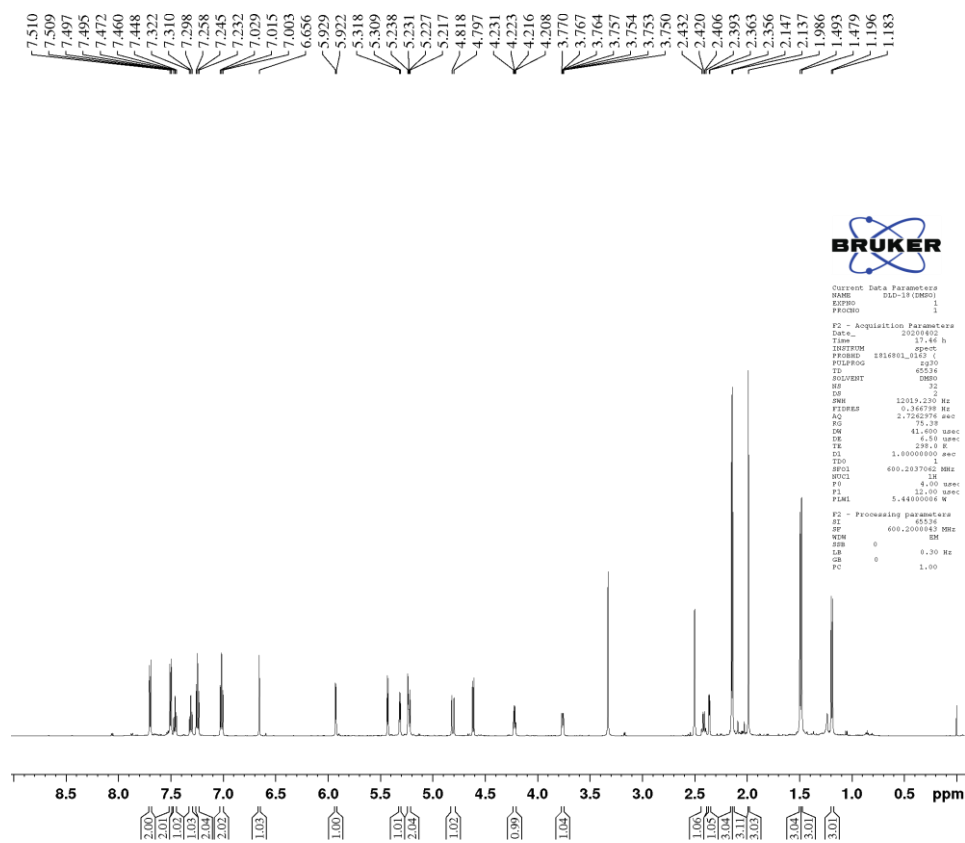

Fig. S3.9  $^1\text{H}$  NMR spectrum (600 MHz, DMSO) of compound 3

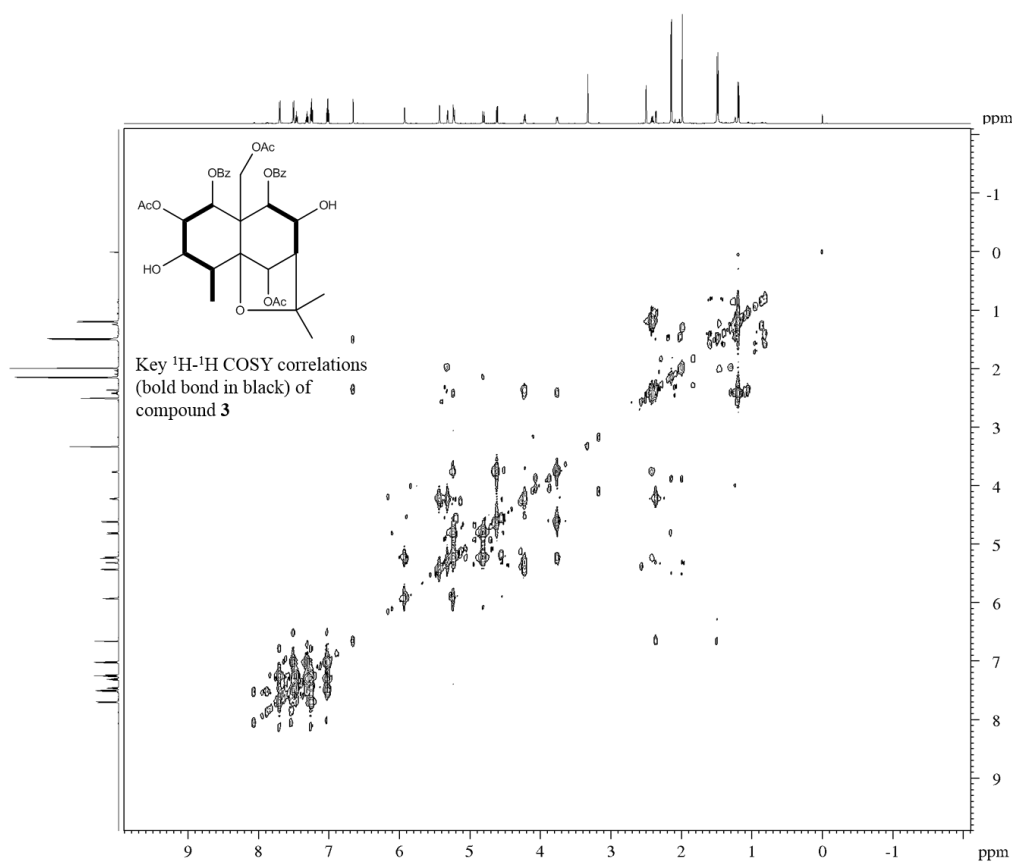

Fig. S3.10  $^1\text{H}$ - $^1\text{H}$  COSY spectrum (600 MHz, DMSO) of compound 3

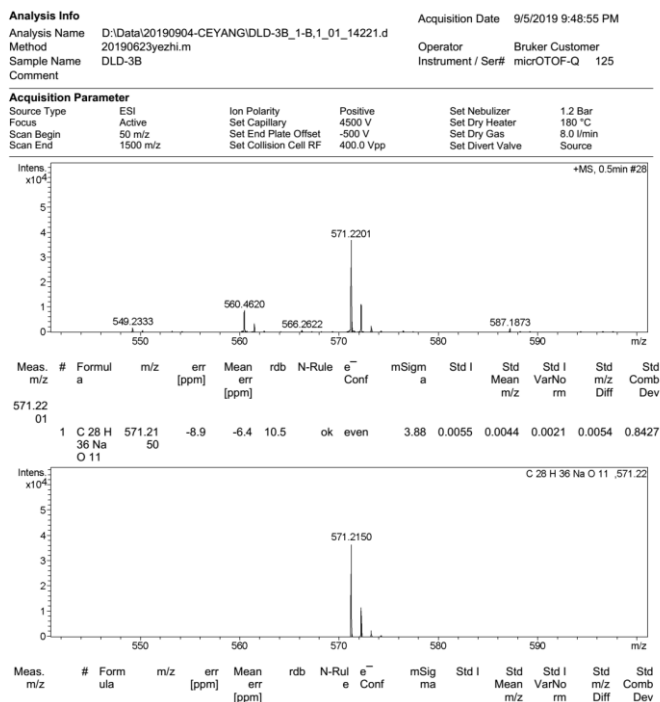

**Fig. S4.1 HRESIMS spectrum of compound 4**  
**Spectrum Peak Pick Report**

FIELD FIELD TEXT

Data Set: 没有

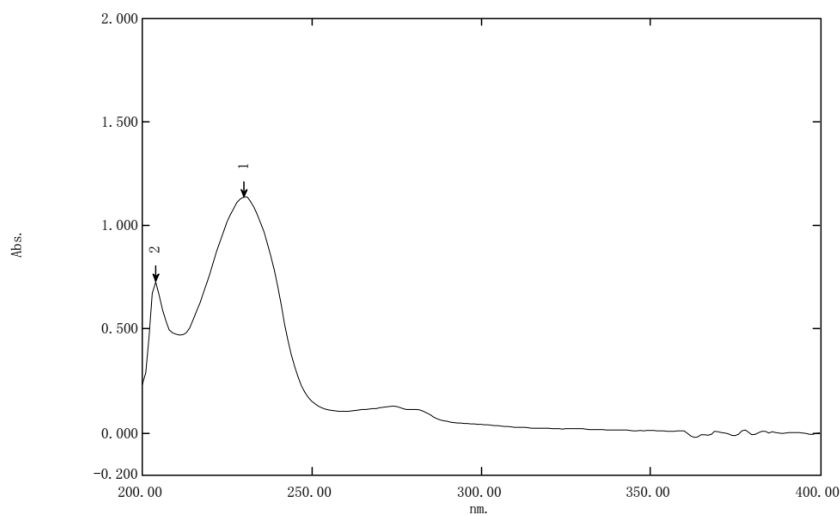

测定属性  
 波长范围 (nm.): 200.00到400.00  
 扫描速度: 中速  
 采样间隔: 1.0  
 自动采样间隔: 停用  
 扫描模式: 单一的

| No. | P/V | Wavelength | Abs.  | 描述 |
|-----|-----|------------|-------|----|
| 1   | ●   | 230.00     | 1.139 |    |
| 2   | ●   | 204.00     | .729  |    |
| 3   | ●   | 260.00     | .105  |    |
| 4   | ●   | 211.00     | .473  |    |

**Fig. S4.2 UV spectrum of compound 4**

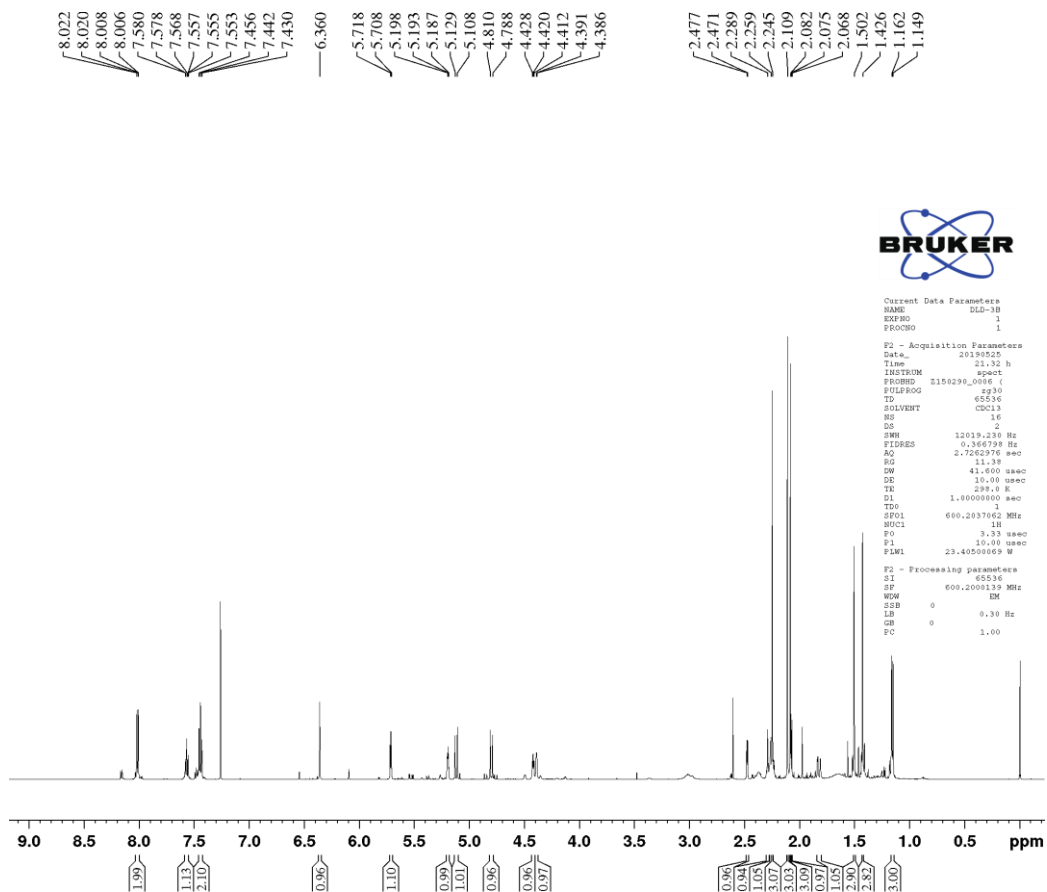

Fig. S4.3 <sup>1</sup>H NMR spectrum (600 MHz, CDCl<sub>3</sub>) of compound 4

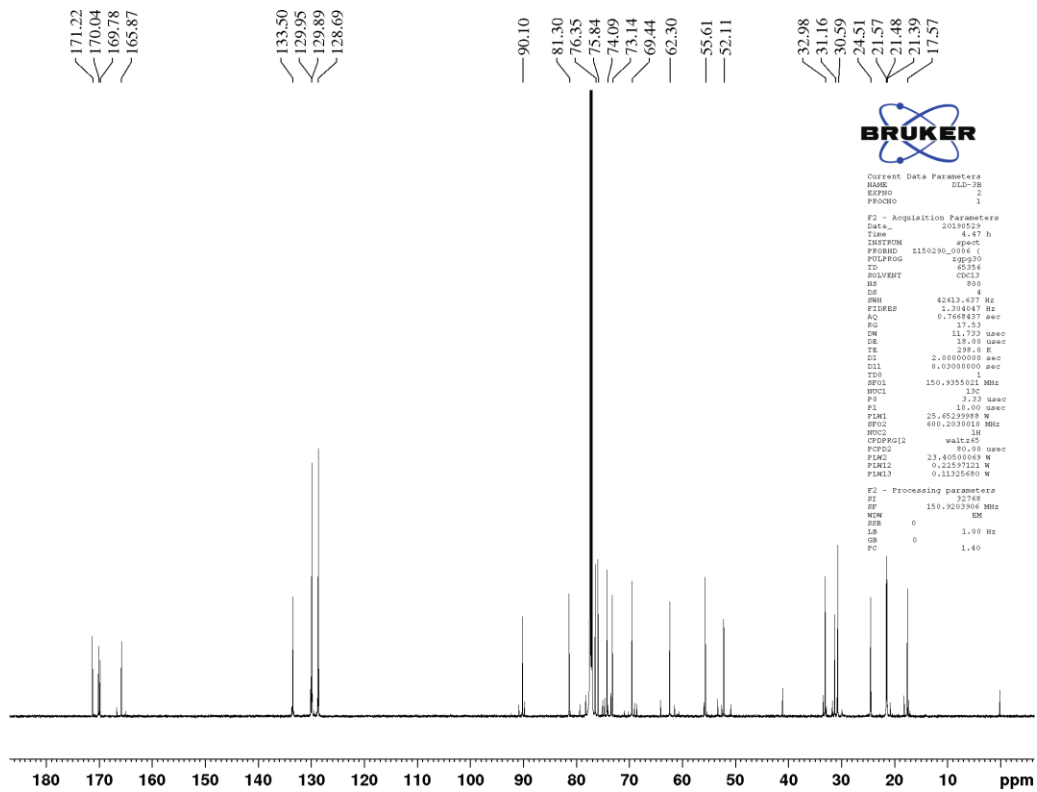

Fig. S4.4 <sup>13</sup>C NMR spectrum (150 MHz, CDCl<sub>3</sub>) of compound 4

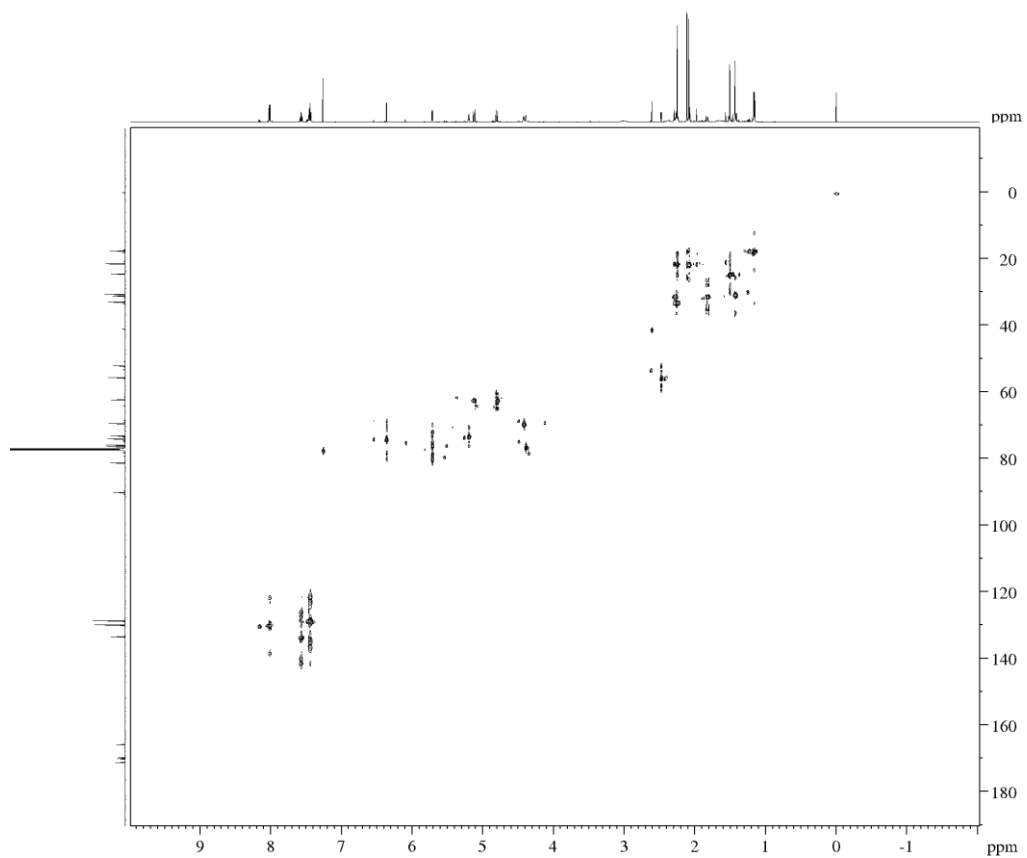

**Fig. S4.5** HSQC spectrum (600 MHz, CDCl<sub>3</sub>) of compound **4**

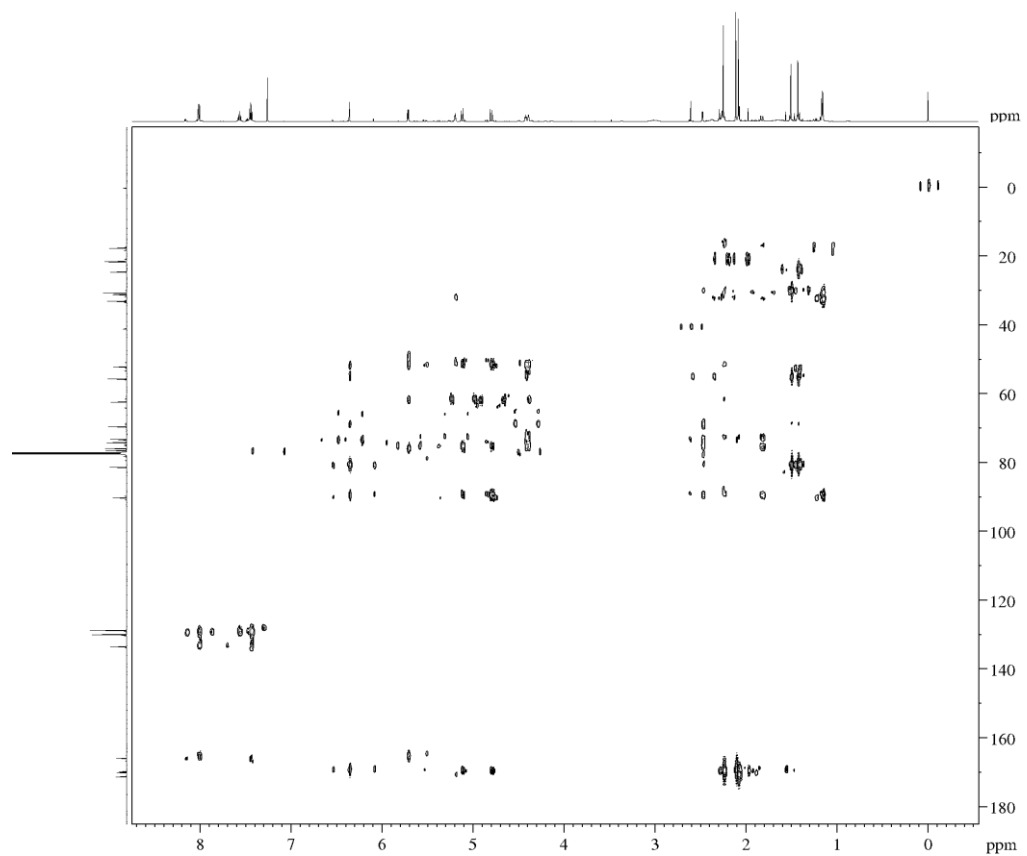

**Fig. S4.6** HMBC spectrum (600 MHz, CDCl<sub>3</sub>) of compound **4**

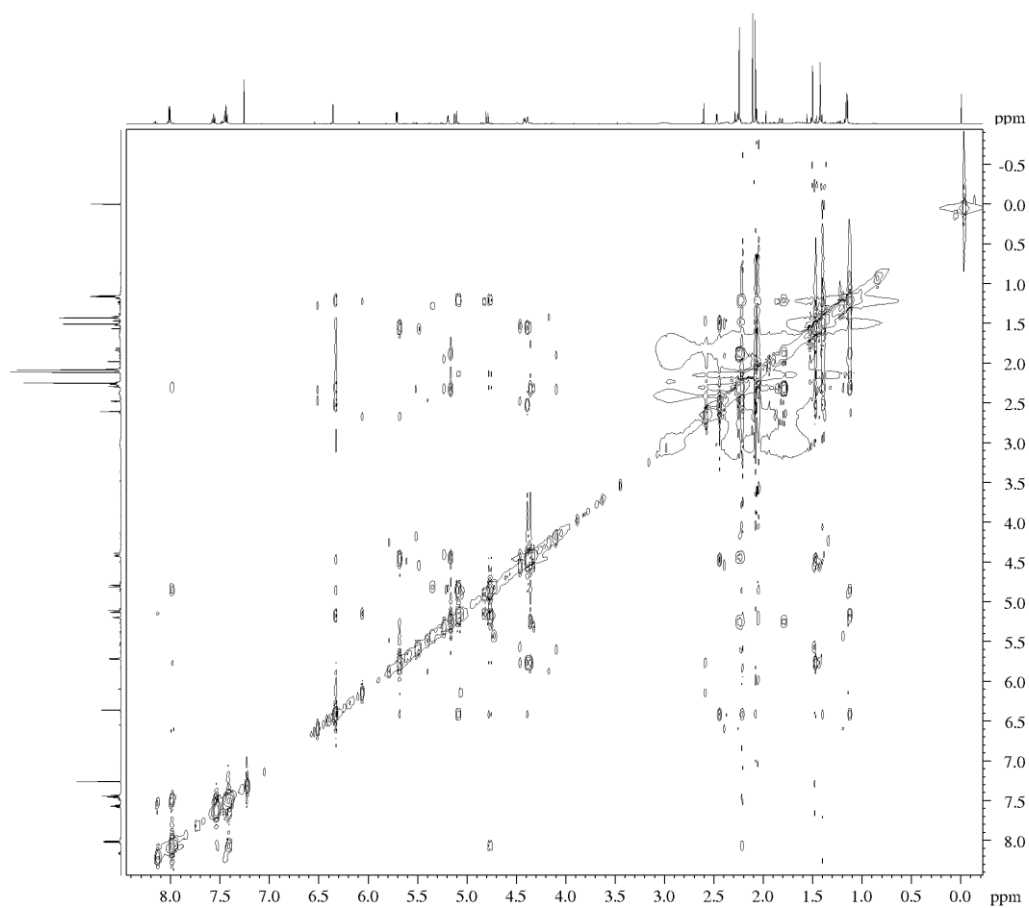

**Fig. S4.7** NOESY spectrum (600 MHz,  $\text{CDCl}_3$ ) of compound **4**

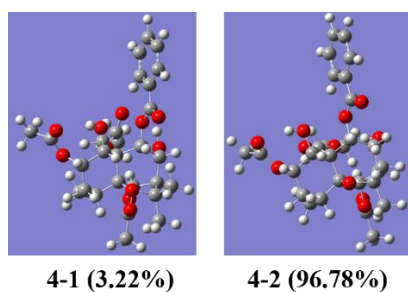

**Fig. S4.8** Most stable conformers of **4** in solvated model calculations at the B3LYP/6-311++G (2d, p) level in ECD calculation

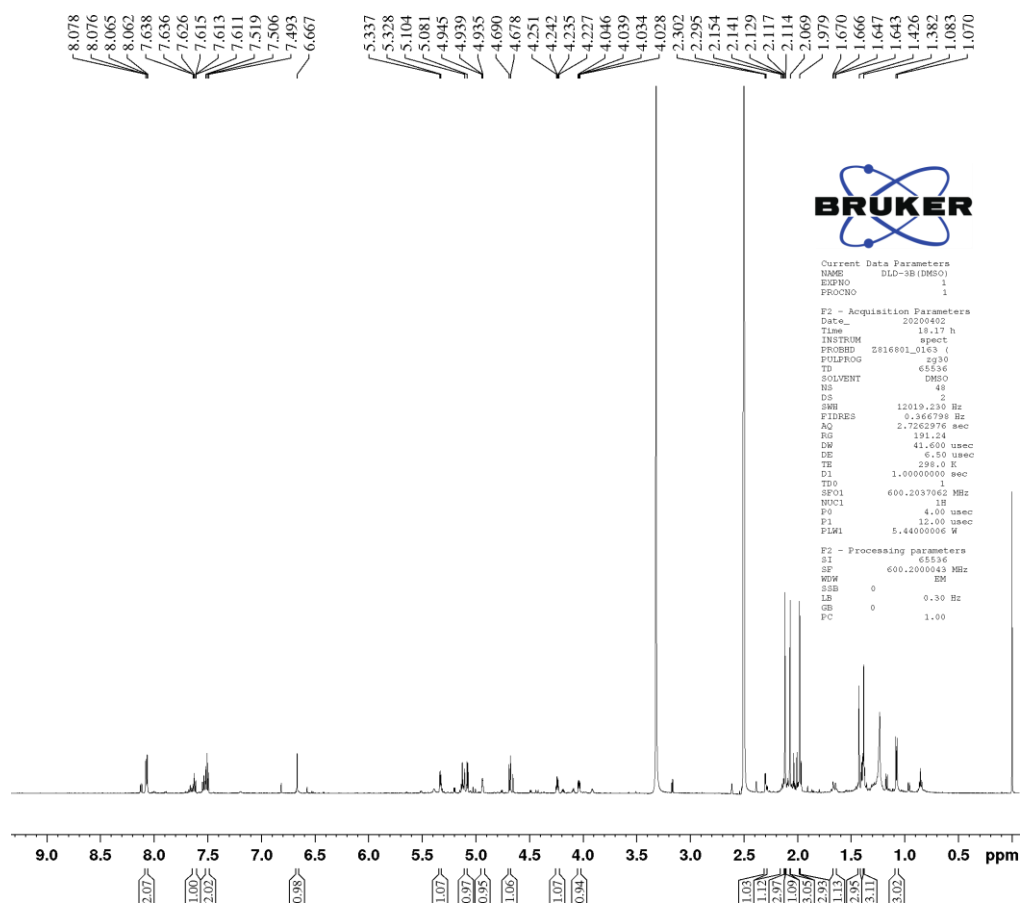

Fig. S4.9  $^1\text{H}$  NMR spectrum (600 MHz, DMSO) of compound **4**

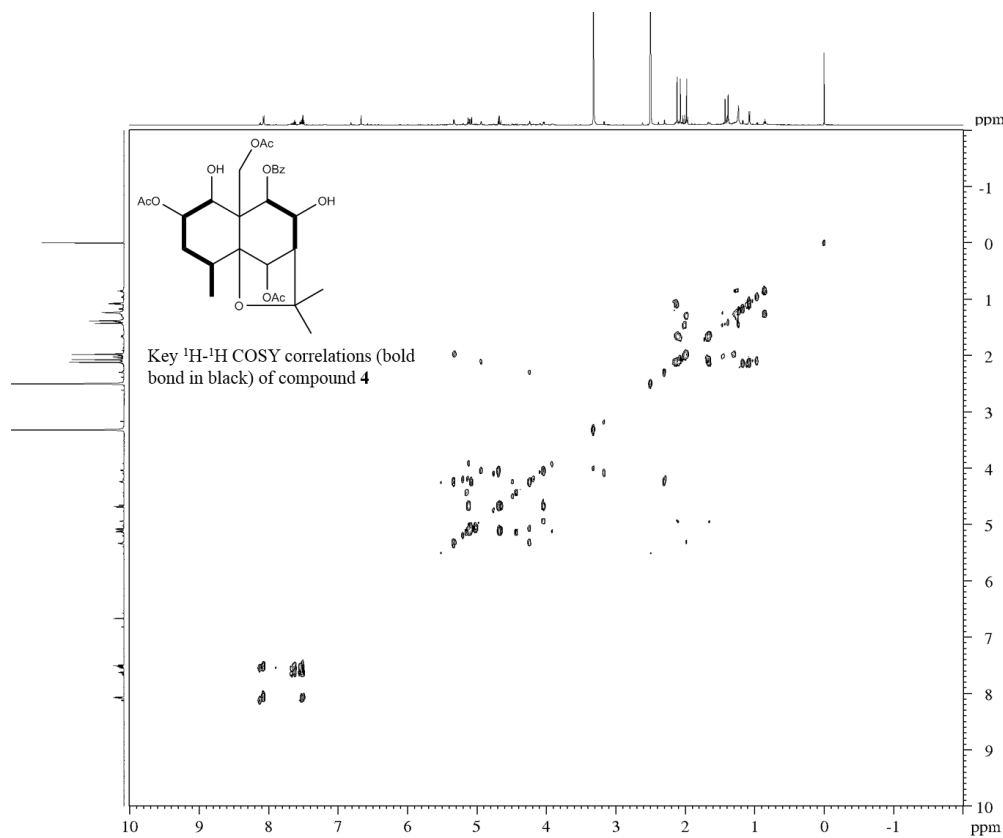

Fig. S4.10  $^1\text{H}$ - $^1\text{H}$  COSY spectrum (600 MHz, DMSO) of compound **4**



**Analysis Info**  
 Analysis Name: D:\Data\20191113CEYANG\DLDD-8B\_1-D\_6\_01\_14549.d  
 Method: 20190623yezhi.m  
 Sample Name: DLD-8B  
 Comment:  
 Acquisition Date: 11/13/2019 4:54:47 PM  
 Operator: Bruker Customer  
 Instrument / Ser#: micrOTOF-Q 125

**Acquisition Parameter**

Source Type: ESI  
 Focus: Active  
 Scan Begin: 50 m/z  
 Scan End: 1500 m/z  
 Ion Polarity: Positive  
 Set Capillary: 4500 V  
 Set End Plate Offset: -500 V  
 Set Collision Cell RF: 600.0 Vpp  
 Set Nebulizer: 1.2 Bar  
 Set Dry Heater: 180 °C  
 Set Dry Gas: 8.0 l/min  
 Set Divert Valve: Source

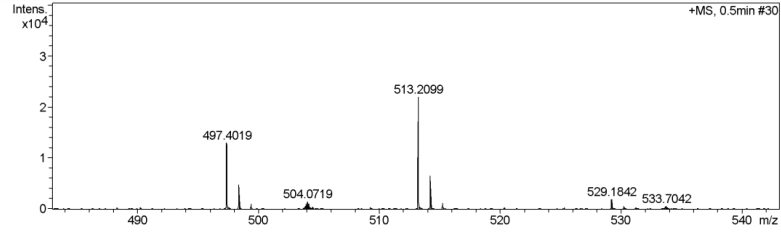

| Meas. m/z | # | Formula                                          | m/z      | err [ppm] | Mean err [ppm] | rdb | N-Rule | e <sup>-</sup> Conf | mSigma | Std I  | Std Mean m/z | Std VarNo | Std I m/z | Std m/z Diff | Std Comb Dev |
|-----------|---|--------------------------------------------------|----------|-----------|----------------|-----|--------|---------------------|--------|--------|--------------|-----------|-----------|--------------|--------------|
| 513.2099  | 1 | C <sub>26</sub> H <sub>34</sub> NaO <sub>9</sub> | 513.2095 | -0.8      | 0.4            | 9.5 | ok     | even                | 7.94   | 0.0123 | 0.0028       | 0.0054    | 0.0036    | 0.8427       |              |

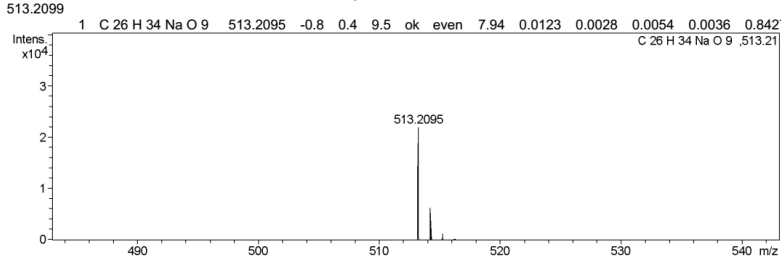

| Meas. m/z | # | Formula                                          | m/z    | err [ppm] | Mean err [ppm] | rdb | N-Rule | e <sup>-</sup> Conf | mSigma | Std I | Std Mean m/z | Std VarNo | Std I m/z | Std m/z Diff | Std Comb Dev |
|-----------|---|--------------------------------------------------|--------|-----------|----------------|-----|--------|---------------------|--------|-------|--------------|-----------|-----------|--------------|--------------|
| 513.2095  |   | C <sub>26</sub> H <sub>34</sub> NaO <sub>9</sub> | 513.21 |           |                |     |        |                     |        |       |              |           |           |              |              |

**Fig. S5.1 HRESIMS spectrum of compound 5**

**Spectrum Peak Pick Report**

FIELD FIELD TEXT

Data Set: 没有

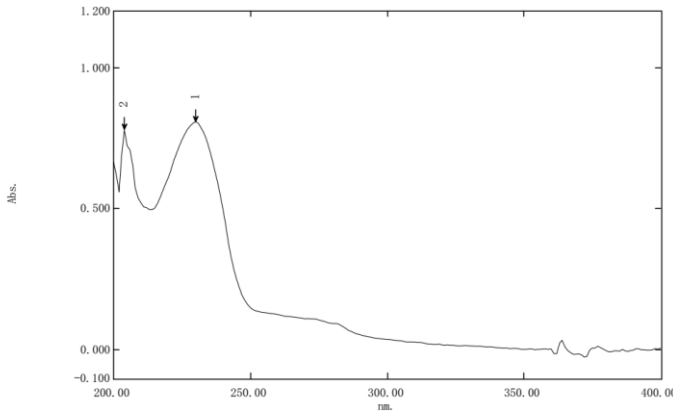

测定属性  
 波长范围 (nm.): 200.00到400.00  
 扫描速度: 中速  
 采样间隔: 1.0  
 自动采样间隔: 停用  
 扫描模式: 单一的

| No. | P/V | Wavelength | Abs. | 描述 |
|-----|-----|------------|------|----|
| 1   | ●   | 230.00     | .808 |    |
| 2   | ●   | 204.00     | .780 |    |
| 3   | ●   | 214.00     | .497 |    |
| 4   | ●   | 202.00     | .560 |    |

**Fig. S5.2 UV spectrum of compound 5**

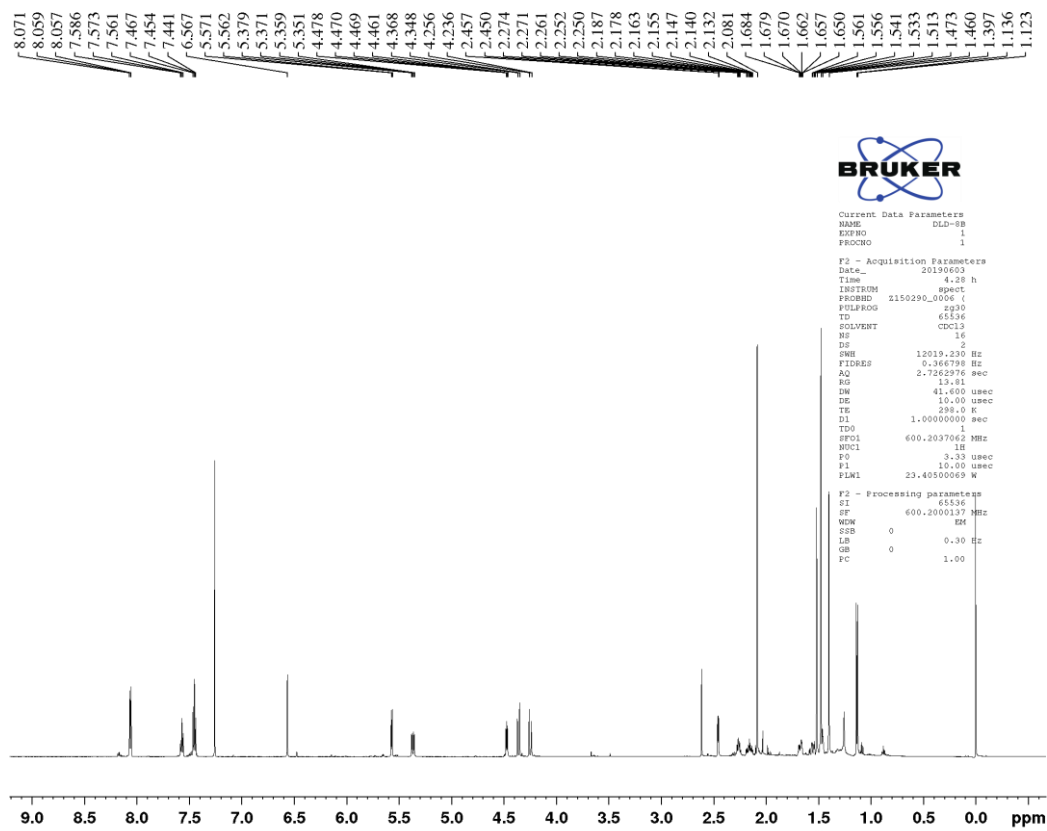

Fig. S5.3  $^1\text{H}$  NMR spectrum (600 MHz,  $\text{CDCl}_3$ ) of compound **5**

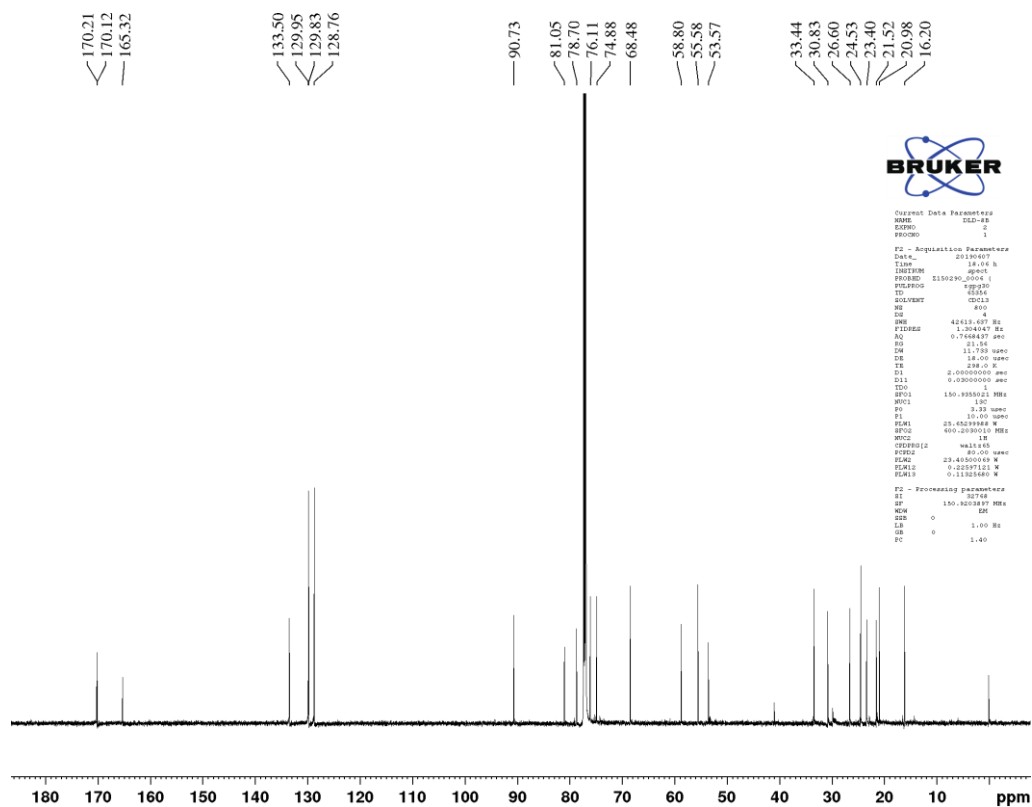

Fig. S5.4  $^{13}\text{C}$  NMR spectrum (150 MHz,  $\text{CDCl}_3$ ) of compound **5**

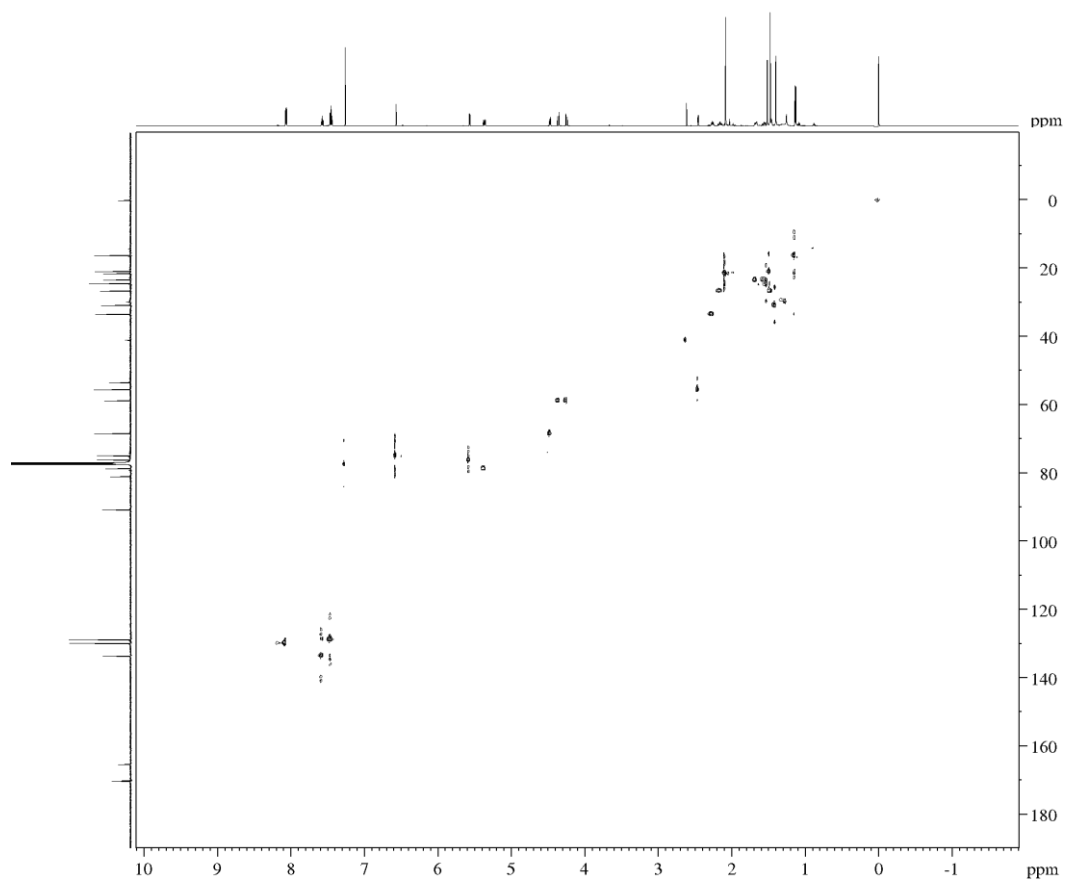

**Fig. S5.5** HSQC spectrum (600 MHz, CDCl<sub>3</sub>) of compound **5**

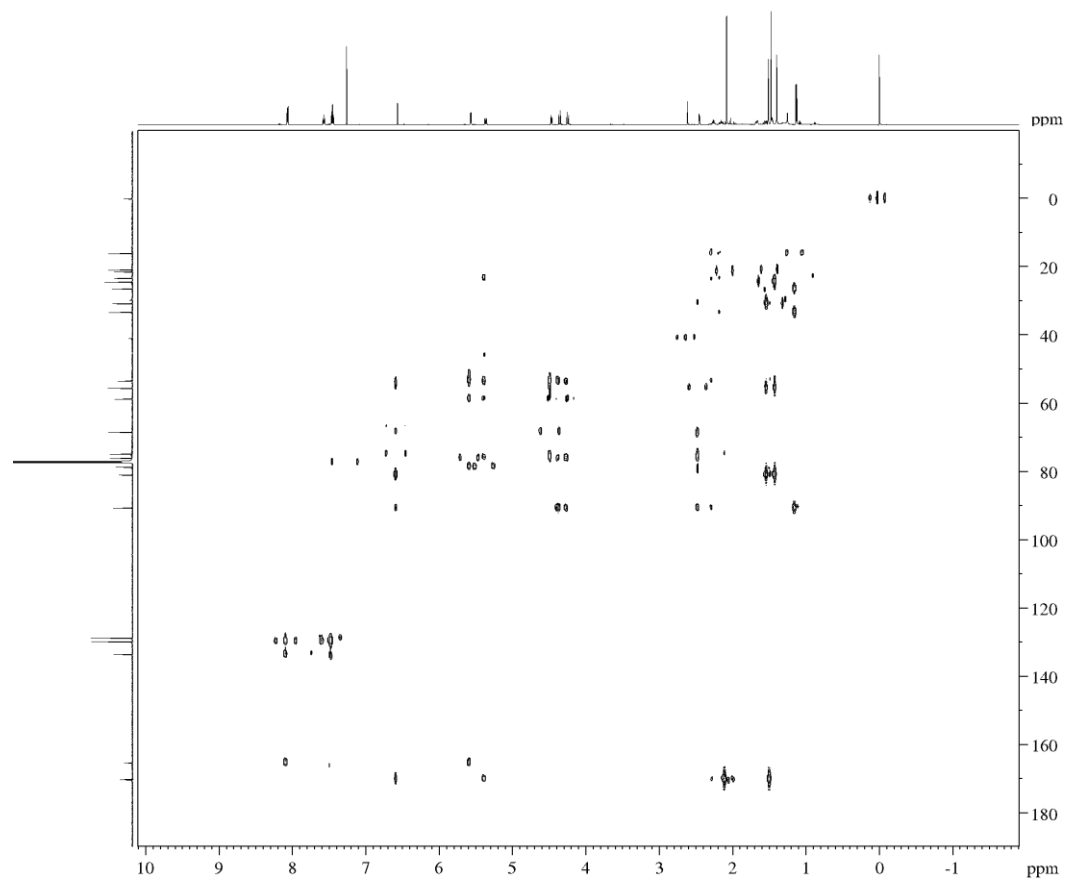

**Fig. S5.6** HMBC spectrum (600 MHz, CDCl<sub>3</sub>) of compound **5**

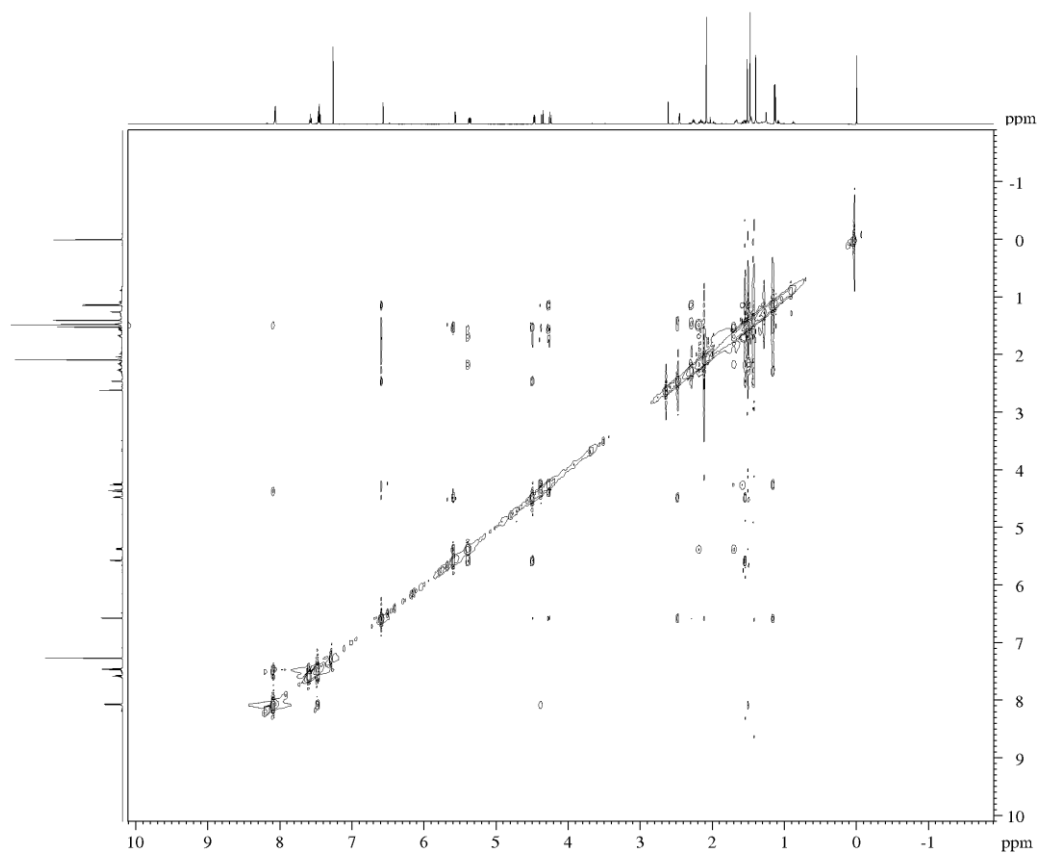

**Fig. S5.7** NOESY spectrum (600 MHz, CDCl<sub>3</sub>) of compound **5**

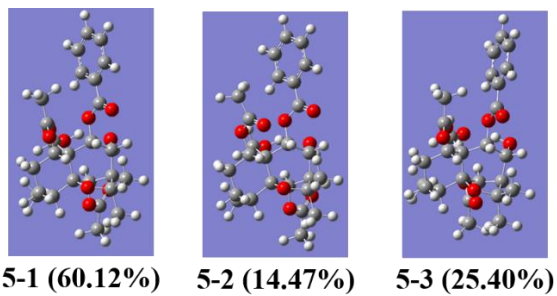

**Fig. S5.8** Most stable conformers of **5** in solvated model calculations at the B3LYP/6-311++G (2d, p) level in ECD calculation

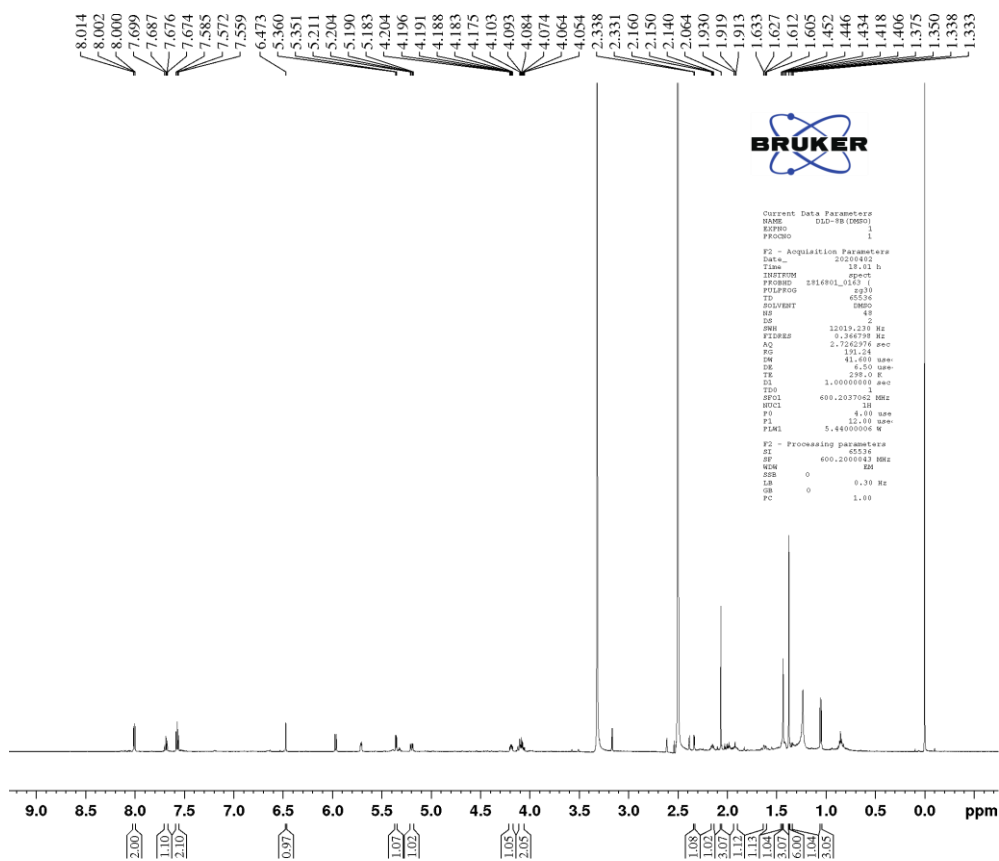

Fig. S5.9  $^1\text{H}$  NMR spectrum (600 MHz, DMSO) of compound **5**

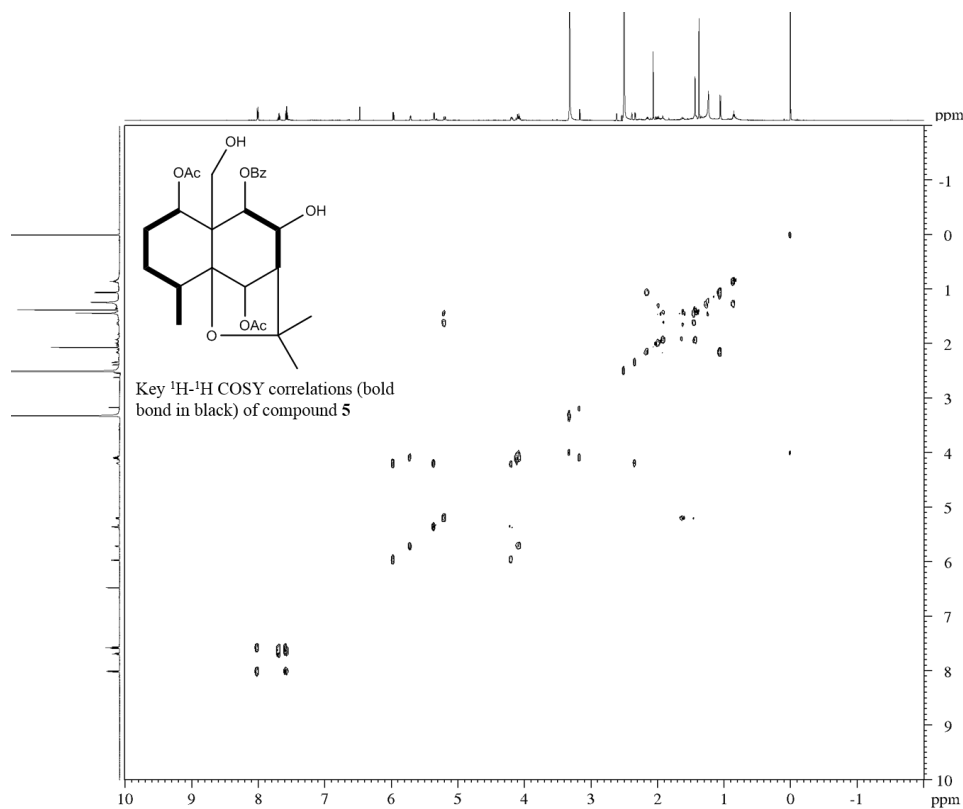

Fig. S5.10  $^1\text{H}$ - $^1\text{H}$  COSY spectrum (600 MHz, DMSO) of compound **5**

**Analysis Info**  
 Analysis Name D:\Data\20190710CEYANG\DL4-1-F\_3\_01\_14109.d  
 Method 20190623yezhi.m  
 Sample Name DLD-4  
 Comment  
 Acquisition Date 7/10/2019 3:26:42 PM  
 Operator Bruker Customer  
 Instrument / Ser# micrOTOF-Q 125

**Acquisition Parameter**  
 Source Type ESI Ion Polarity Positive Set Nebulizer 1.2 Bar  
 Focus Active Set Capillary 4500 V Set Dry Heater 180 °C  
 Scan Begin 50 m/z Set End Plate Offset -500 V Set Dry Gas 8.0 l/min  
 Scan End 1500 m/z Set Collision Cell RF 400.0 Vpp Set Divert Valve Source

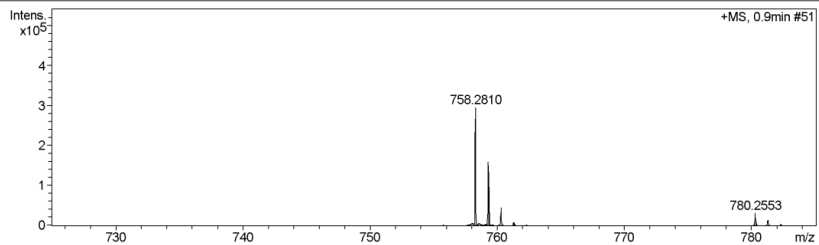

| Meas. m/z | #  | Formula                                                        | m/z      | err [ppm] | Mean err [ppm] | rdb  | N-Rule | e <sup>-</sup> Conf | mSigma | Std I  | Std Mean m/z | Std I VarNo | Std I m/z Diff | Std Comb Dev |
|-----------|----|----------------------------------------------------------------|----------|-----------|----------------|------|--------|---------------------|--------|--------|--------------|-------------|----------------|--------------|
| 758.28    | 10 | C <sub>41</sub> H <sub>44</sub> N <sub>4</sub> O <sub>13</sub> | 758.2807 | -0.3      | 0.6            | 20.5 | ok     | even                | 43.26  | 0.0507 | 0.0022       | 0.0167      | 0.0045         | 0.8427       |

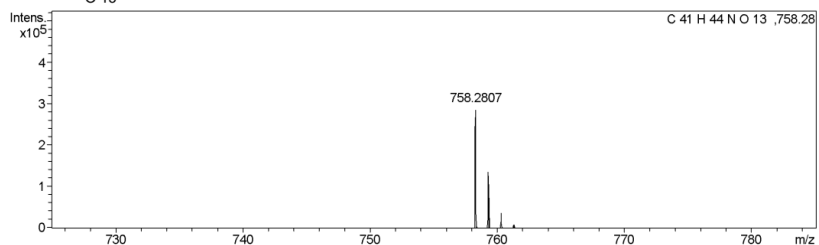

| Meas. m/z | #  | Formula                                                        | m/z      | err [ppm] | Mean err [ppm] | rdb  | N-Rule | e <sup>-</sup> Conf | mSigma | Std I  | Std Mean m/z | Std I VarNo | Std I m/z Diff | Std Comb Dev |
|-----------|----|----------------------------------------------------------------|----------|-----------|----------------|------|--------|---------------------|--------|--------|--------------|-------------|----------------|--------------|
| 758.28    | 10 | C <sub>41</sub> H <sub>44</sub> N <sub>4</sub> O <sub>13</sub> | 758.2807 | -0.3      | 0.6            | 20.5 | ok     | even                | 43.26  | 0.0507 | 0.0022       | 0.0167      | 0.0045         | 0.8427       |

**Fig. S6.1** HRESIMS spectrum of compound **6**

**Spectrum Peak Pick Report**

FIELD FIELD TEXT

Data Set: 没有

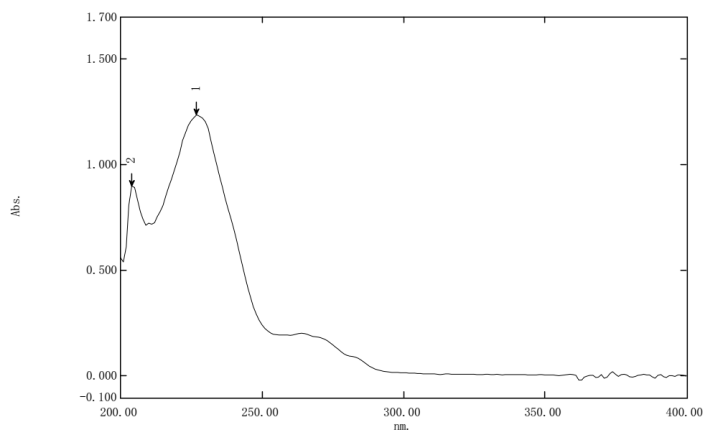

测定属性  
 波长范围 (nm.): 200.00到400.00  
 扫描速度: 中速  
 采样间隔: 1.0  
 自动采样间隔: 停用  
 扫描模式: 单一的

| No. | P/V | Wavelength | Abs.  | 描述 |
|-----|-----|------------|-------|----|
| 1   | ●   | 227.00     | 1.238 |    |
| 2   | ●   | 204.00     | .900  |    |
| 3   | ●   | 209.00     | .714  |    |

**Fig. S6.2** UV spectrum of compound **6**

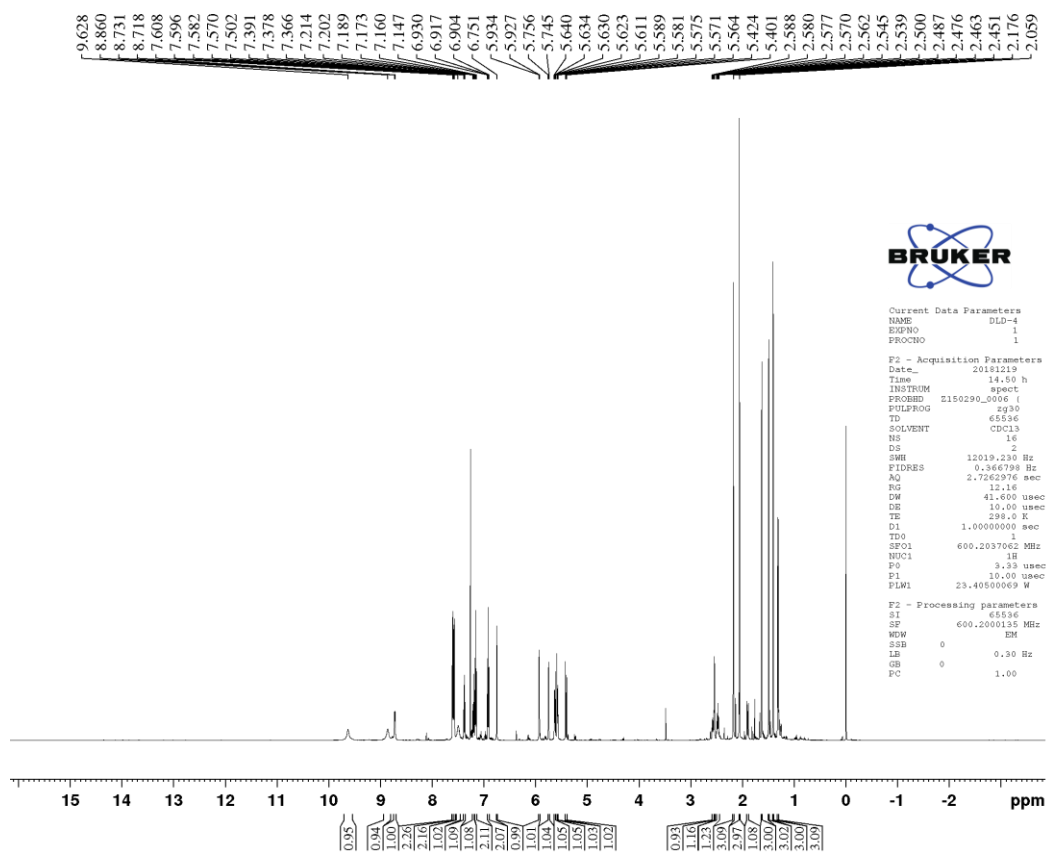

Fig. S6.3  $^1\text{H}$  NMR spectrum (600 MHz,  $\text{CDCl}_3$ ) of compound 6

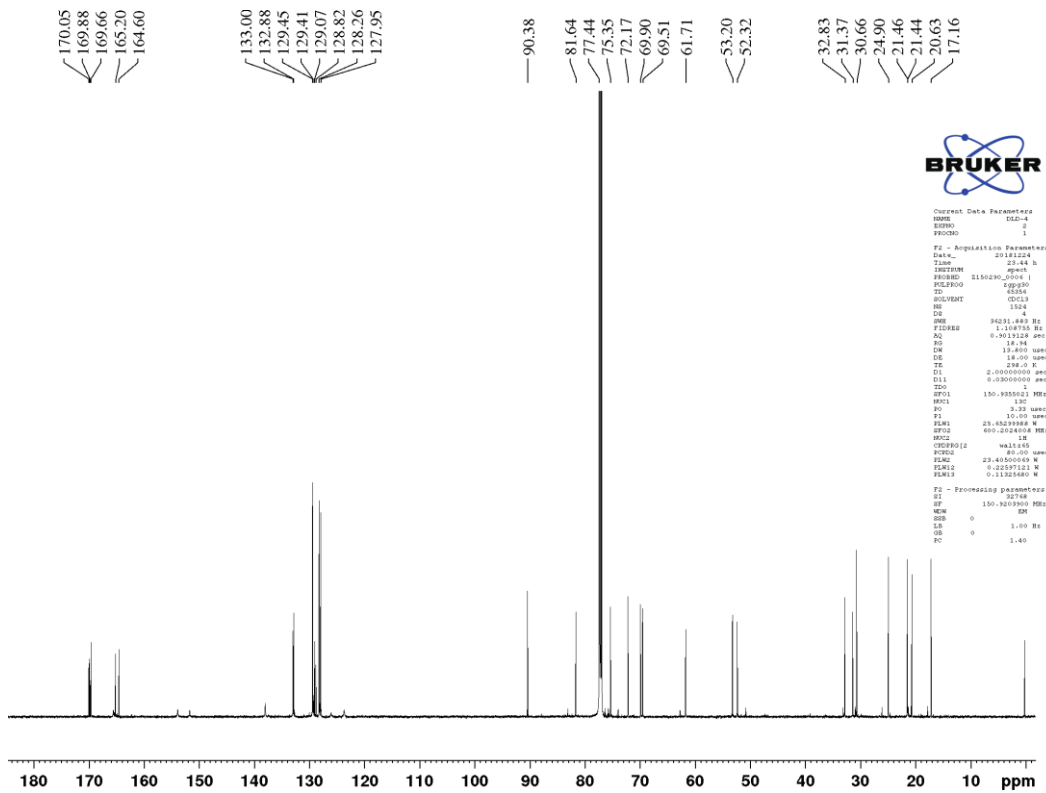

Fig. S6.4  $^{13}\text{C}$  NMR spectrum (150 MHz,  $\text{CDCl}_3$ ) of compound 6

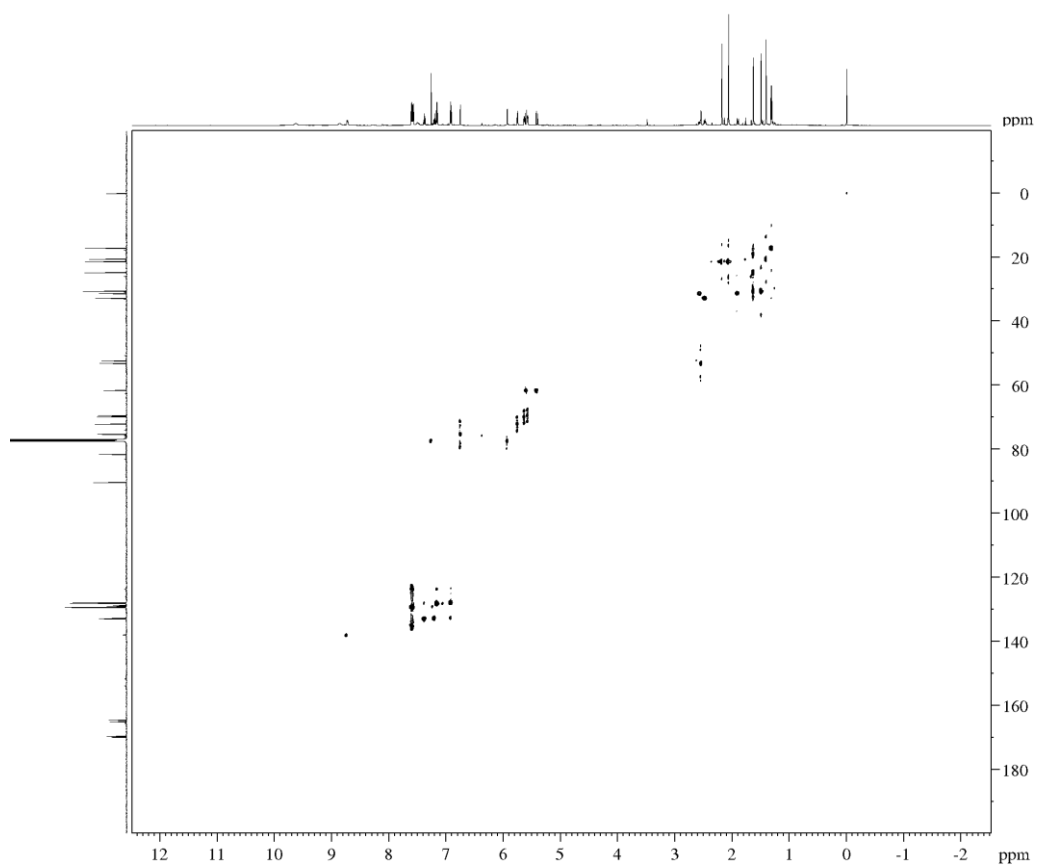

**Fig. S6.5** HSQC spectrum (600 MHz, CDCl<sub>3</sub>) of compound **6**

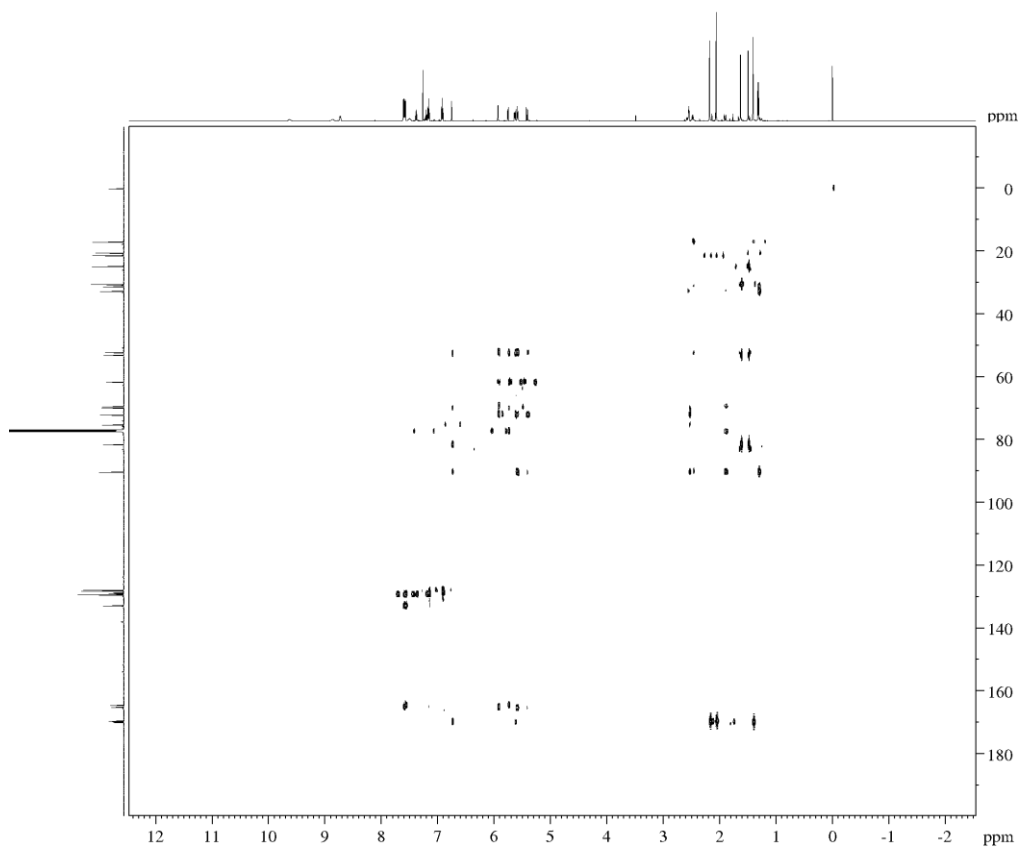

**Fig. S6.6** HMBC spectrum (600 MHz, CDCl<sub>3</sub>) of compound **6**



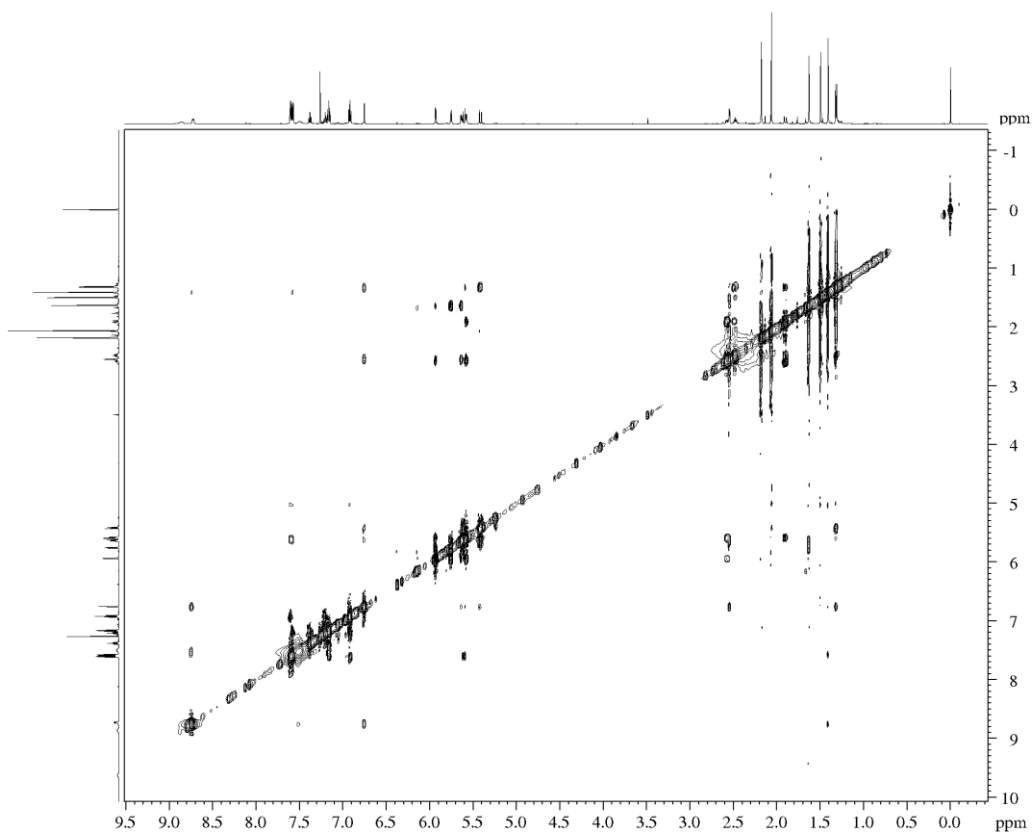

**Fig. S6.7** NOESY spectrum (600 MHz, CDCl<sub>3</sub>) of compound **6**

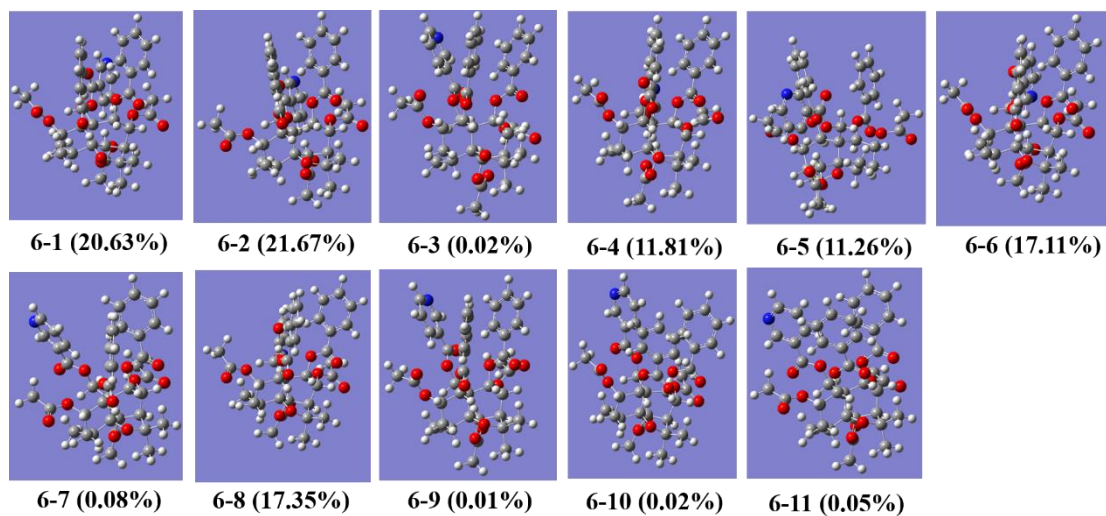

**Fig. S6.8** Most stable conformers of **6** in solvated model calculations at the B3LYP/6-311++G (2d, p) level in ECD calculation

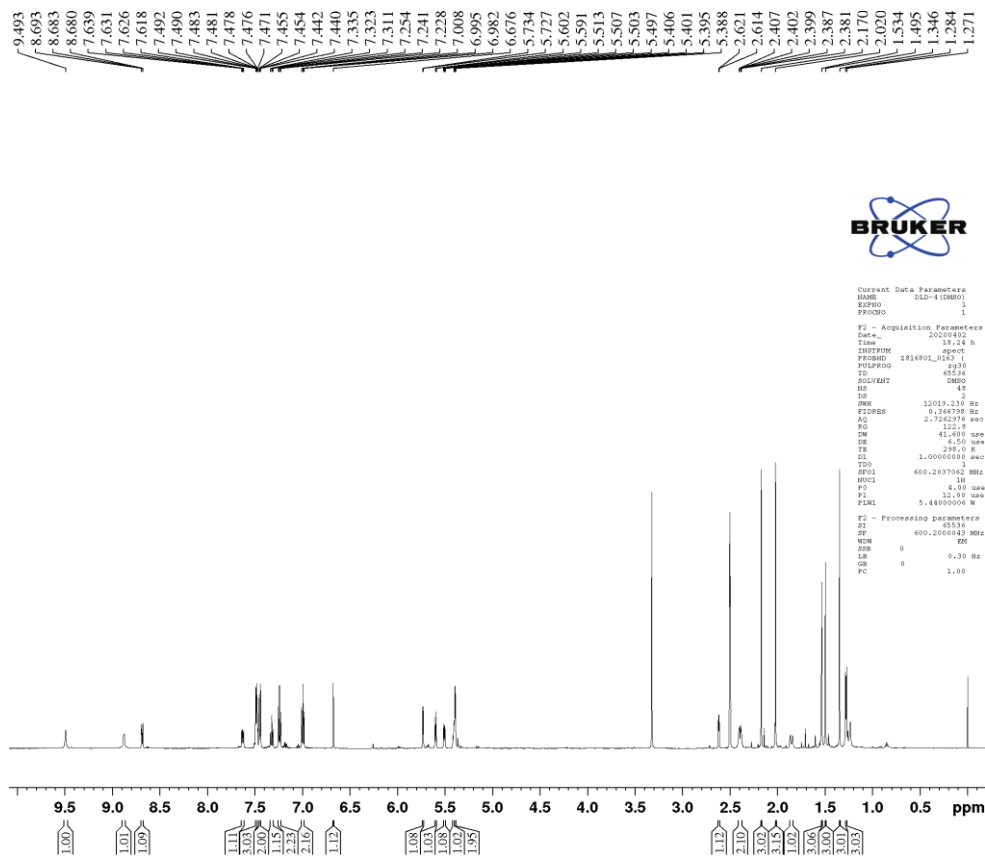

Fig. S6.9  $^1\text{H}$  NMR spectrum (600 MHz, DMSO) of compound **6**

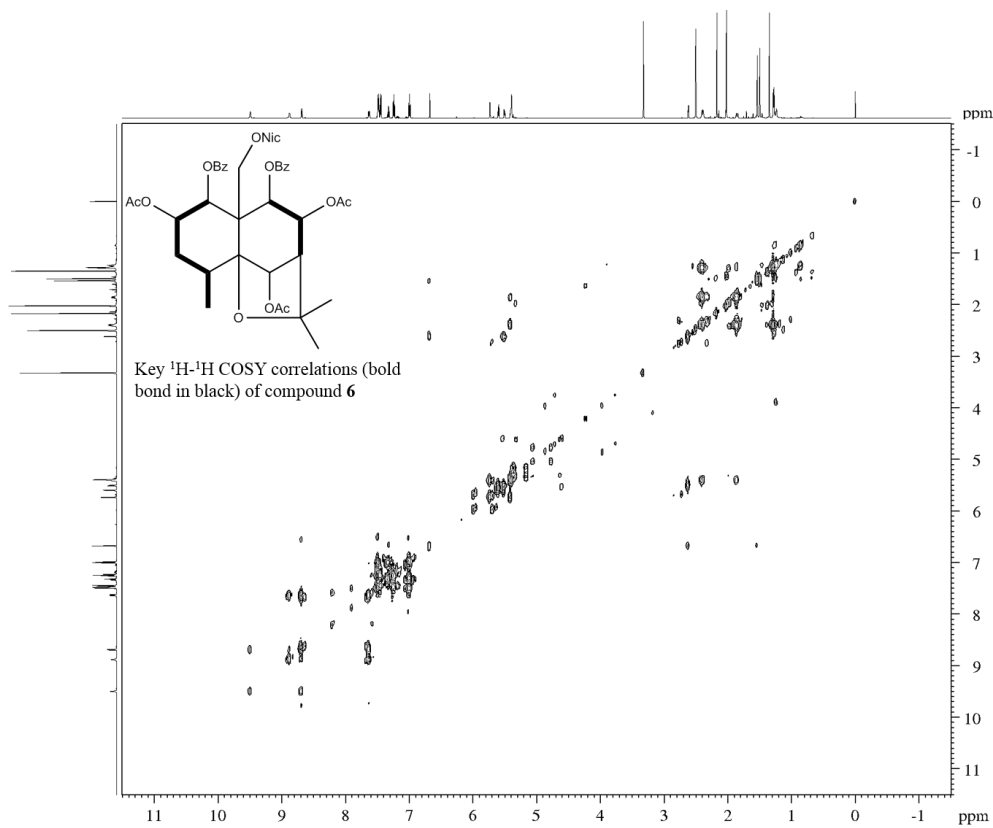

Fig. S6.10  $^1\text{H}$ - $^1\text{H}$  COSY spectrum (600 MHz, DMSO) of compound **6**

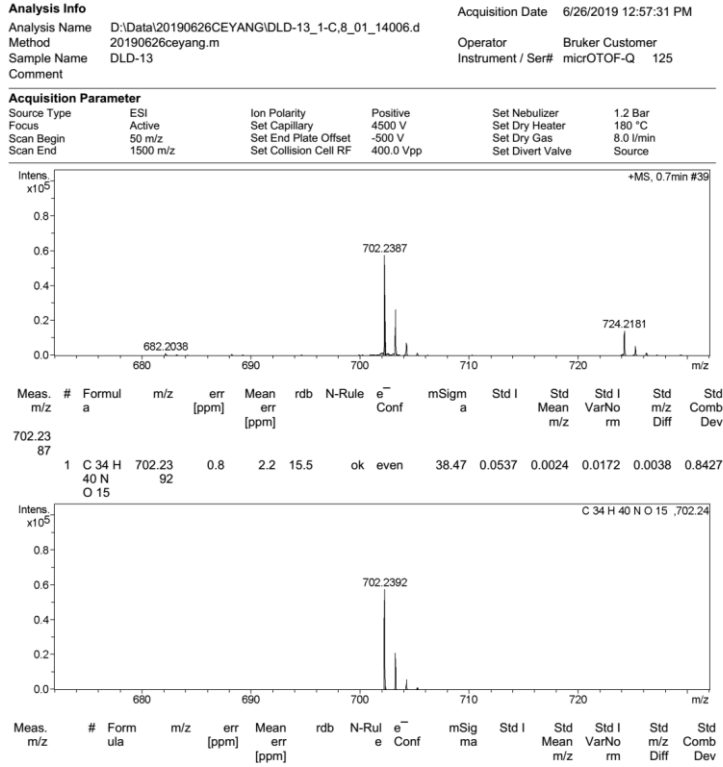

**Fig. S7.1** HRESIMS spectrum of compound 7

**Spectrum Peak Pick Report**

FIELD FIELD TEXT

Data Set: 没有

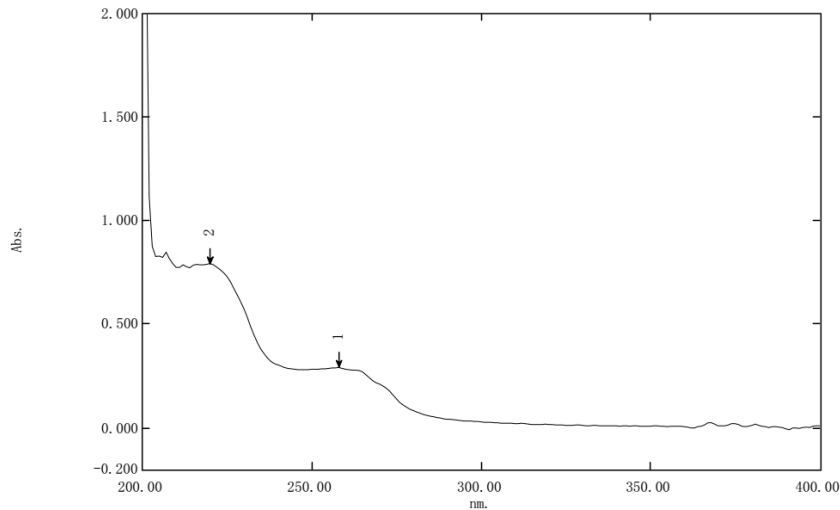

测定属性  
 波长范围 (nm.): 200.00到400.00  
 扫描速度: 中速  
 采样间隔: 1.0  
 自动采样间隔: 停用  
 扫描模式: 单一的

| No. | P/V | Wavelength | Abs. | 描述 |
|-----|-----|------------|------|----|
| 1   | ●   | 258.00     | .291 |    |
| 2   | ●   | 220.00     | .793 |    |
| 3   | ●   | 248.00     | .281 |    |
| 4   | ●   | 210.00     | .774 |    |

**Fig. S7.2** UV spectrum of compound 7

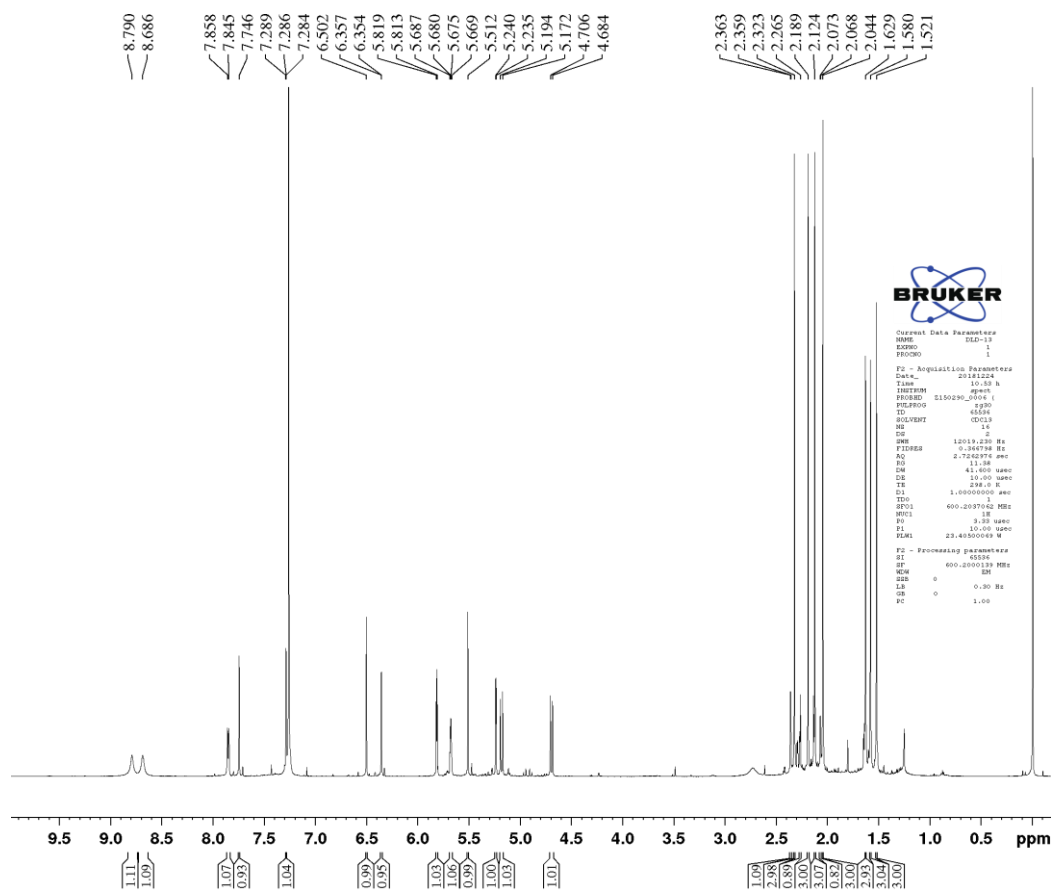

Fig. S7.3 <sup>1</sup>H NMR spectrum (600 MHz, CDCl<sub>3</sub>) of compound 7

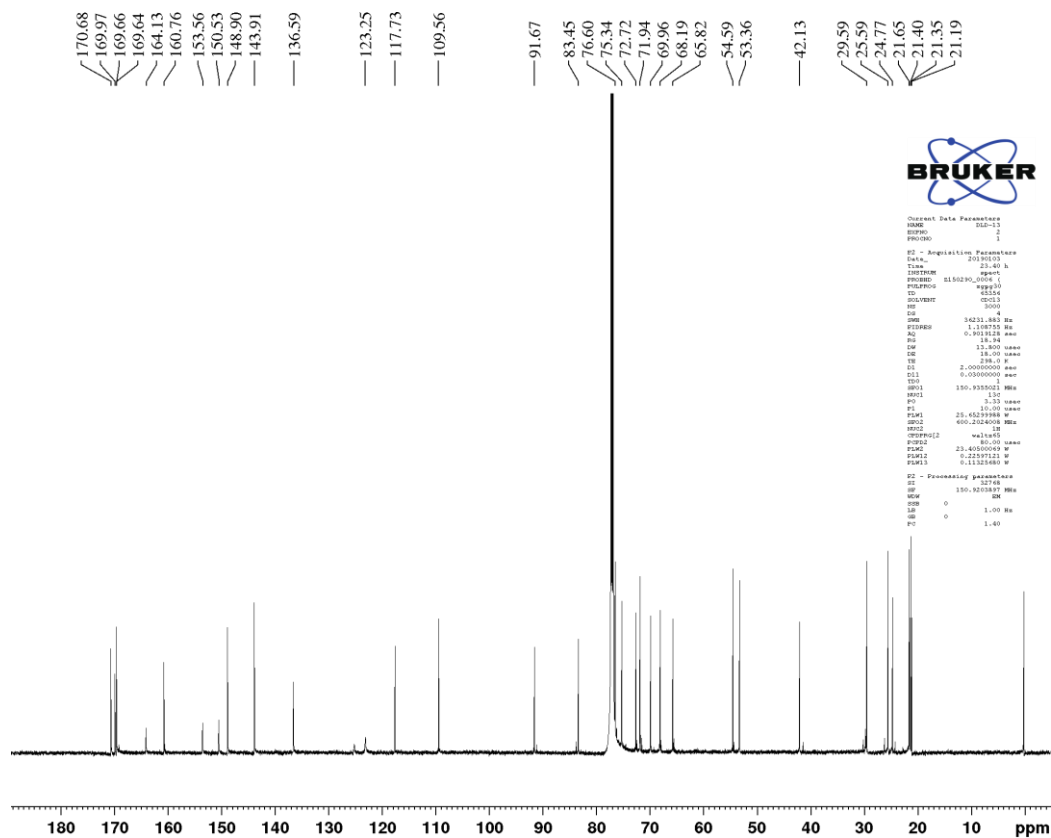

Fig. S7.4 <sup>13</sup>C NMR spectrum (150 MHz, CDCl<sub>3</sub>) of compound 7

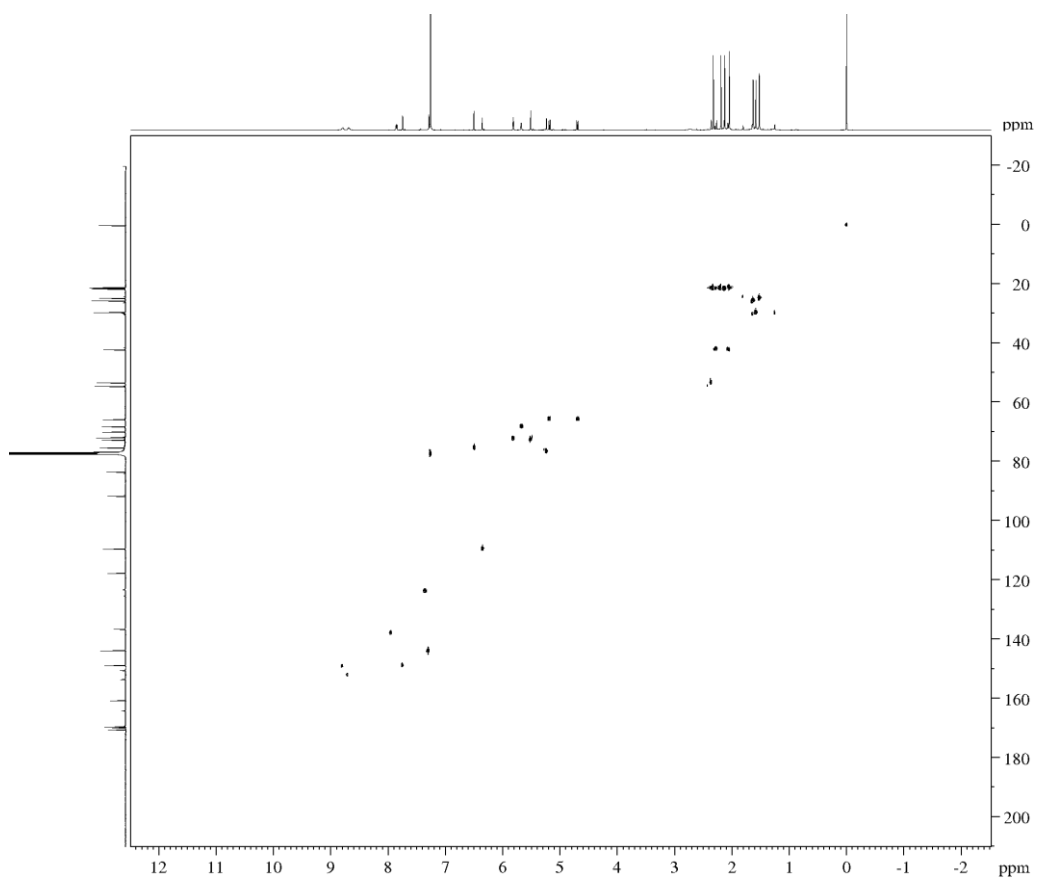

**Fig. S7.5** HSQC spectrum (600 MHz, CDCl<sub>3</sub>) of compound **7**

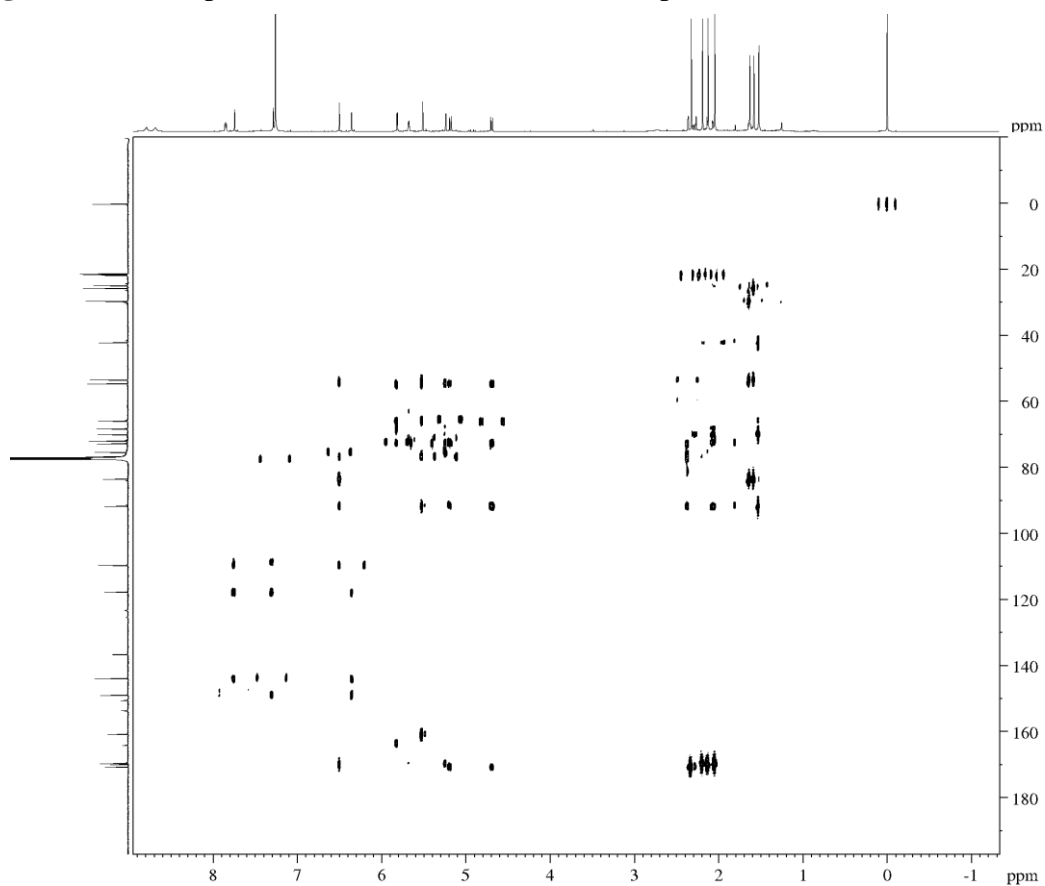

**Fig. S7.6** HMBC spectrum (600 MHz, CDCl<sub>3</sub>) of compound **7**

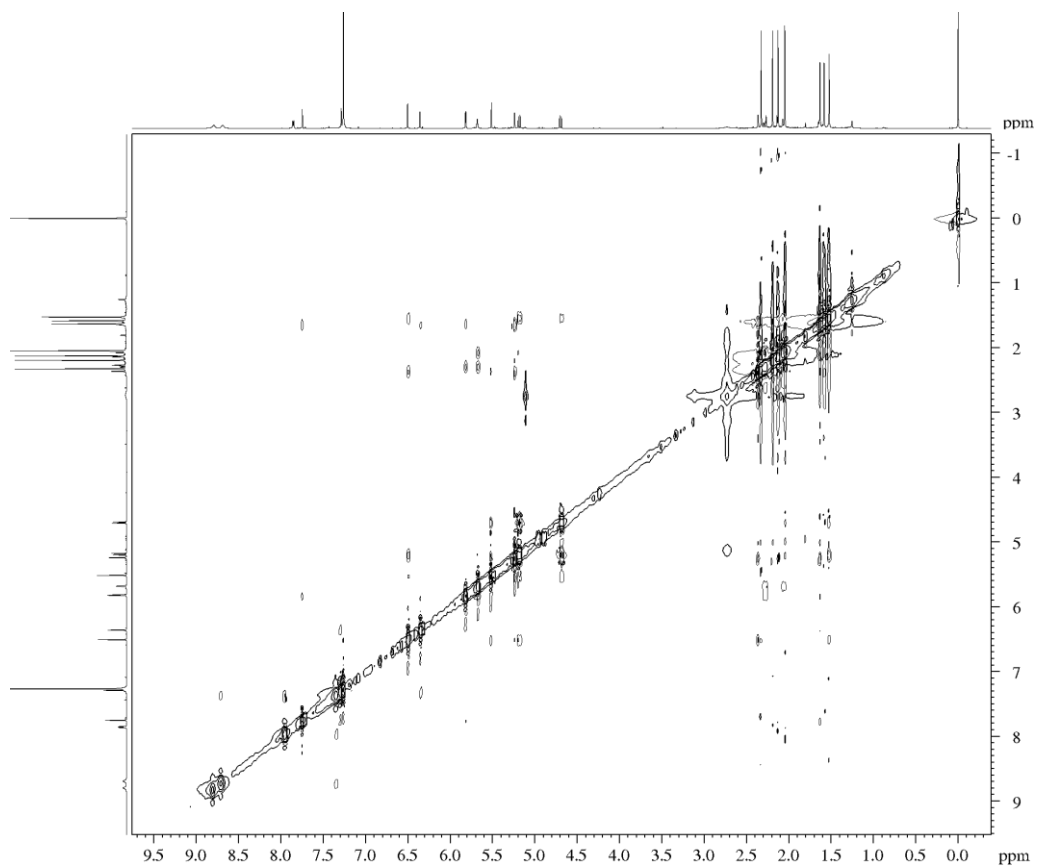

**Fig. S7.7** NOESY spectrum (600 MHz,  $\text{CDCl}_3$ ) of compound **7**

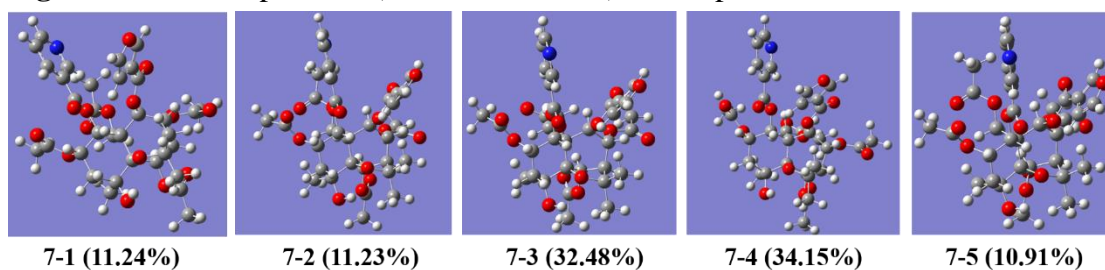

**Fig. S7.8** Most stable conformers of **7** in solvated model calculations at the B3LYP/6-311++G (2d, p) level in ECD calculation

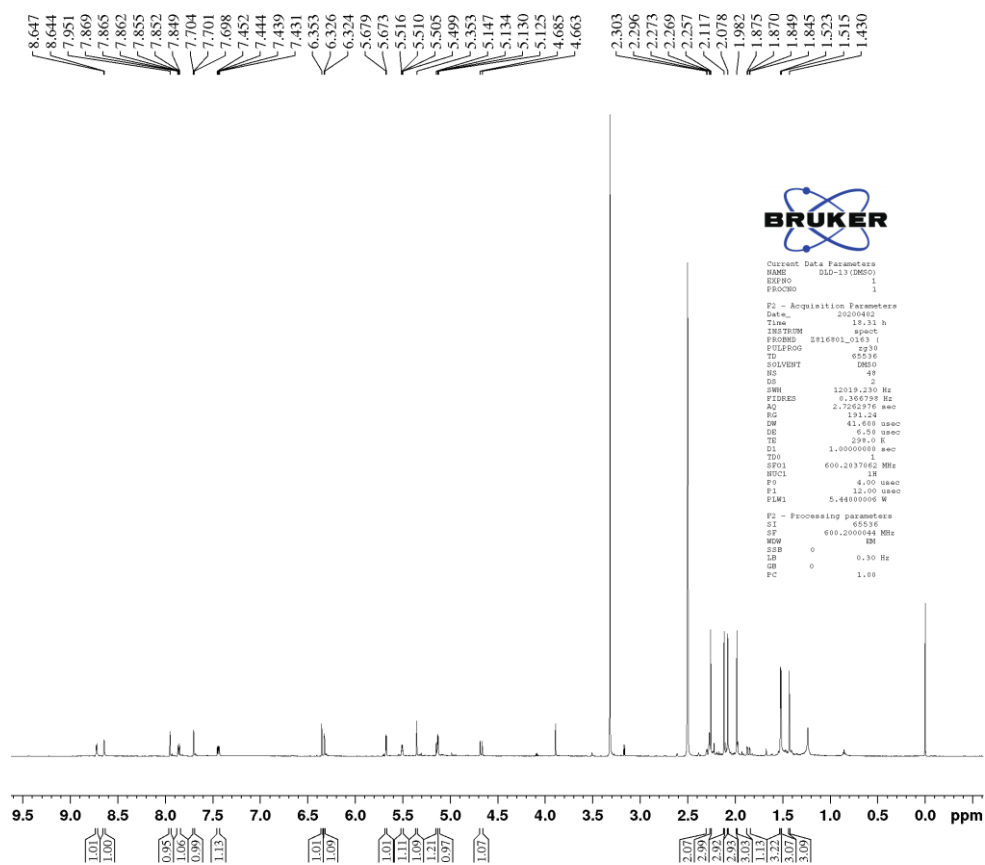

Fig. S7.9  $^1\text{H}$  NMR spectrum (600 MHz, DMSO) of compound **7**

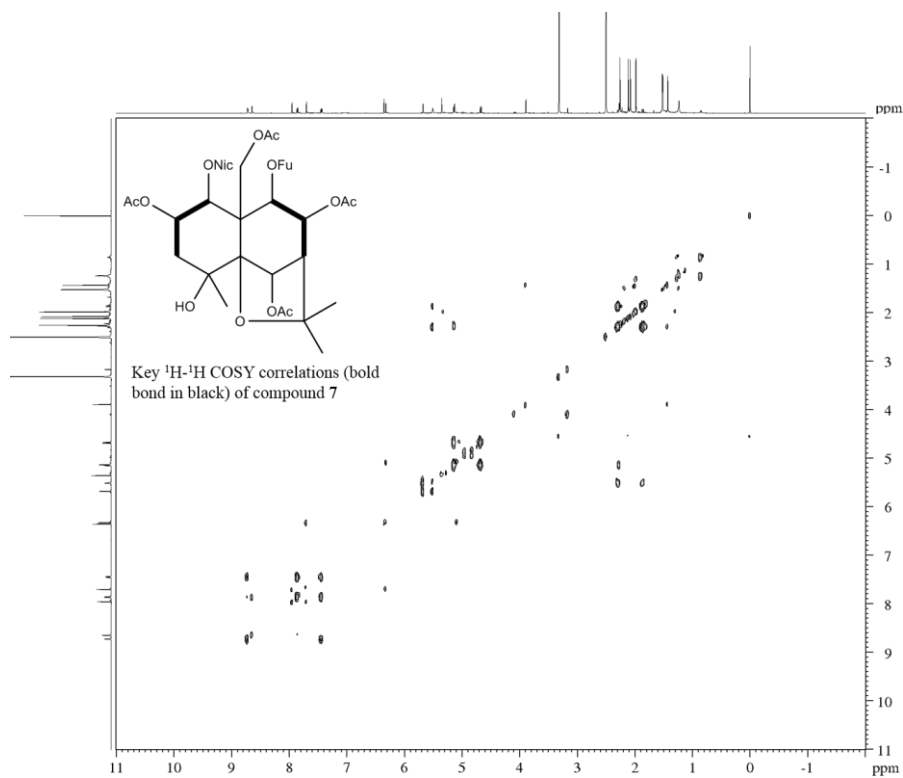

Fig. S7.10  $^1\text{H}$ - $^1\text{H}$  COSY spectrum (600 MHz, DMSO) of compound **7**

**Analysis Info**  
 Analysis Name D:\Data\20190904-CEYANG\DLLD-12C\_1-B\_4\_01\_14223.d  
 Method 20190623yezhi.m  
 Sample Name DLLD-12C  
 Comment  
 Acquisition Date 9/5/2019 9:56:21 PM  
 Operator Bruker Customer  
 Instrument / Ser# micrOTOF-Q 125

**Acquisition Parameter**  
 Source Type ESI Ion Polarity Positive Set Nebulizer 1.2 Bar  
 Focus Active Set Capillary 4500 V Set Dry Heater 180 °C  
 Scan Begin 50 m/z Set End Plate Offset -500 V Set Dry Gas 8.0 l/min  
 Scan End 1500 m/z Set Collision Cell RF 400.0 Vpp Set Divert Valve Source

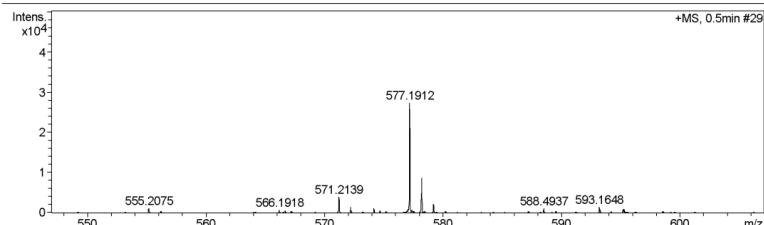

| Meas. #  | Formula                                           | m/z      | err [ppm] | Mean err [ppm] | rdb | N-Rule | e <sup>-</sup> Conf | mSigma | Std I  | Std Mean | Std Var | Std I Norm | Std m/z Diff | Std Comb Dev |
|----------|---------------------------------------------------|----------|-----------|----------------|-----|--------|---------------------|--------|--------|----------|---------|------------|--------------|--------------|
| 577.1912 | C <sub>26</sub> H <sub>34</sub> NaO <sub>13</sub> | 577.1892 | -3.6      | -2.3           | 9.5 | ok     | even                | 14.42  | 0.0270 | 0.0020   | 0.0090  | 0.0038     | 0.8427       |              |

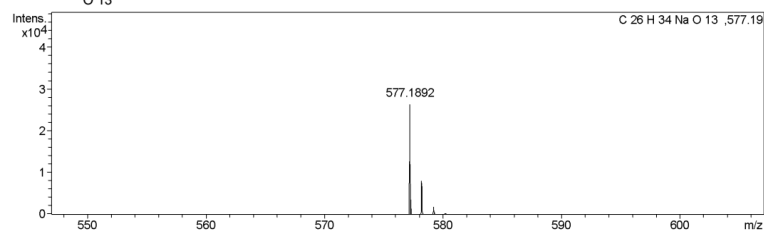

| Meas. #  | Formula                                           | m/z      | err [ppm] | Mean err [ppm] | rdb | N-Rule | e <sup>-</sup> Conf | mSigma | Std I  | Std Mean | Std Var | Std I Norm | Std m/z Diff | Std Comb Dev |
|----------|---------------------------------------------------|----------|-----------|----------------|-----|--------|---------------------|--------|--------|----------|---------|------------|--------------|--------------|
| 577.1912 | C <sub>26</sub> H <sub>34</sub> NaO <sub>13</sub> | 577.1892 | -3.6      | -2.3           | 9.5 | ok     | even                | 14.42  | 0.0270 | 0.0020   | 0.0090  | 0.0038     | 0.8427       |              |

Fig. S8.1 HRESIMS spectrum of compound 8

### Spectrum Peak Pick Report

FIELD FIELD TEXT

Data Set: 没有

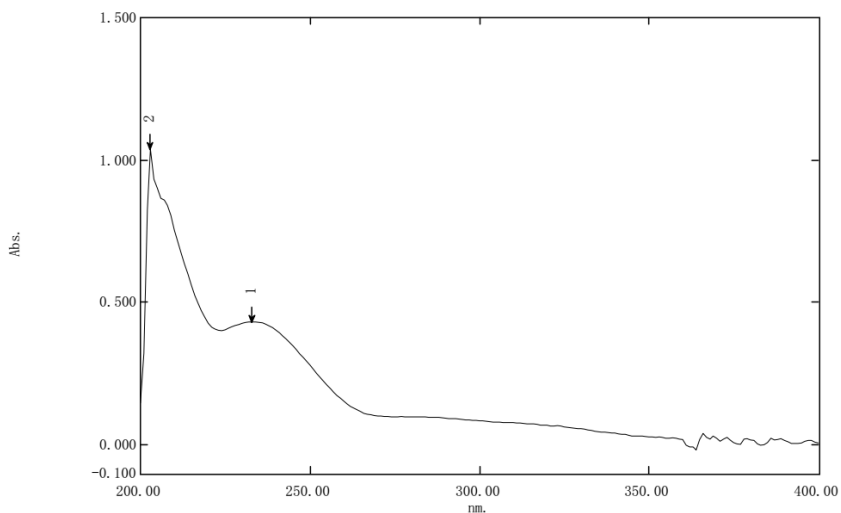

测定属性  
 波长范围 (nm.): 200.00到400.00  
 扫描速度: 中速  
 采样间隔: 1.0  
 自动采样间隔: 停用  
 扫描模式: 单一的

| No. | P/V | Wavelength | Abs.  | 描述 |
|-----|-----|------------|-------|----|
| 1   | ●   | 233.00     | .432  |    |
| 2   | ●   | 203.00     | 1.038 |    |
| 3   | ●   | 224.00     | .401  |    |

Fig. S8.2 UV spectrum of compound 8



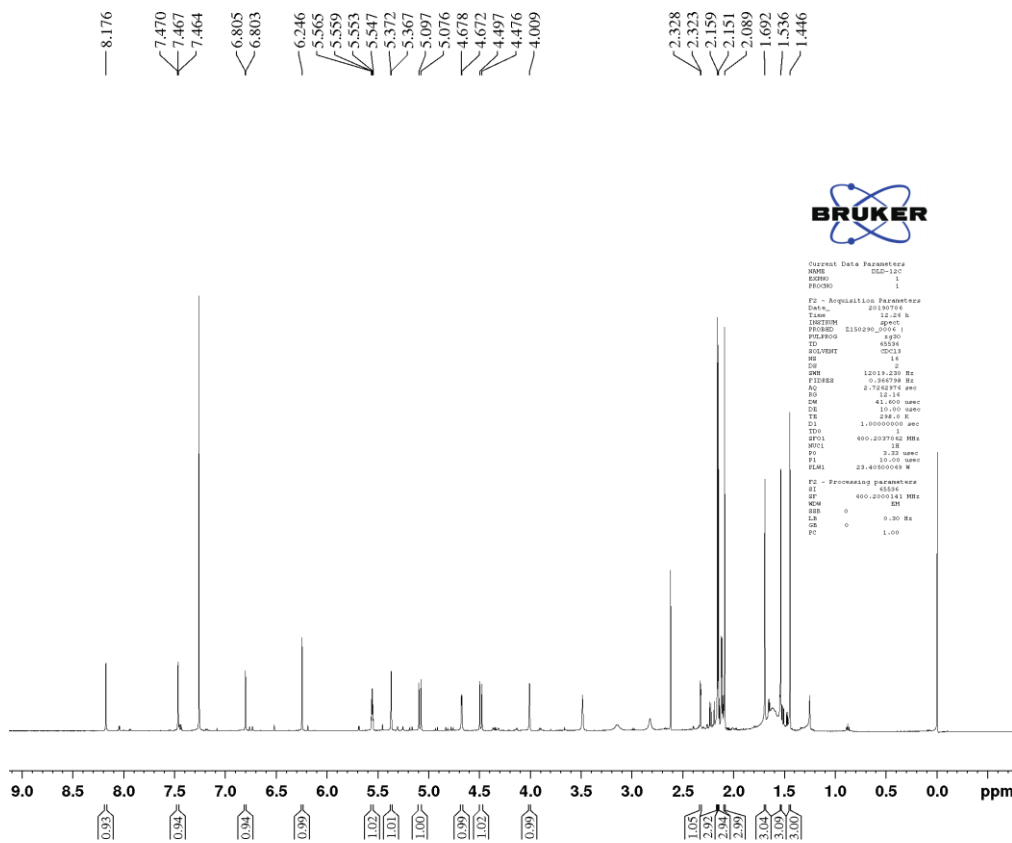

Fig. S8.3  $^1\text{H}$  NMR spectrum (600 MHz,  $\text{CDCl}_3$ ) of compound **8**

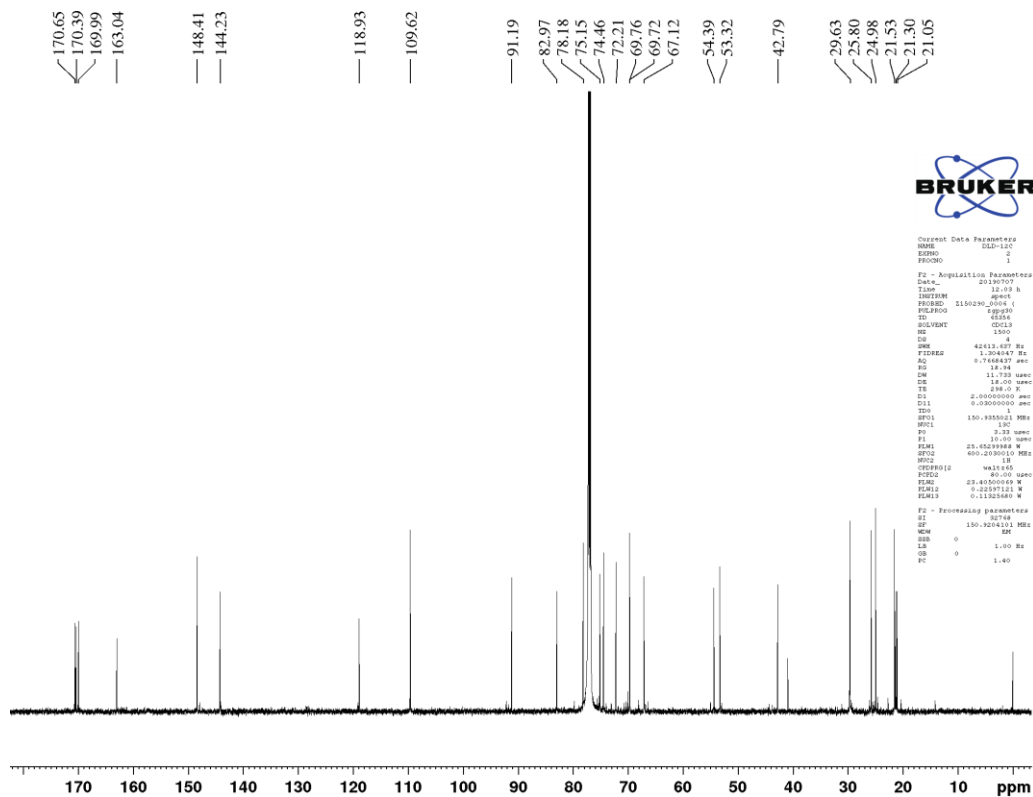

Fig. S8.4  $^{13}\text{C}$  NMR spectrum (150 MHz,  $\text{CDCl}_3$ ) of compound **8**

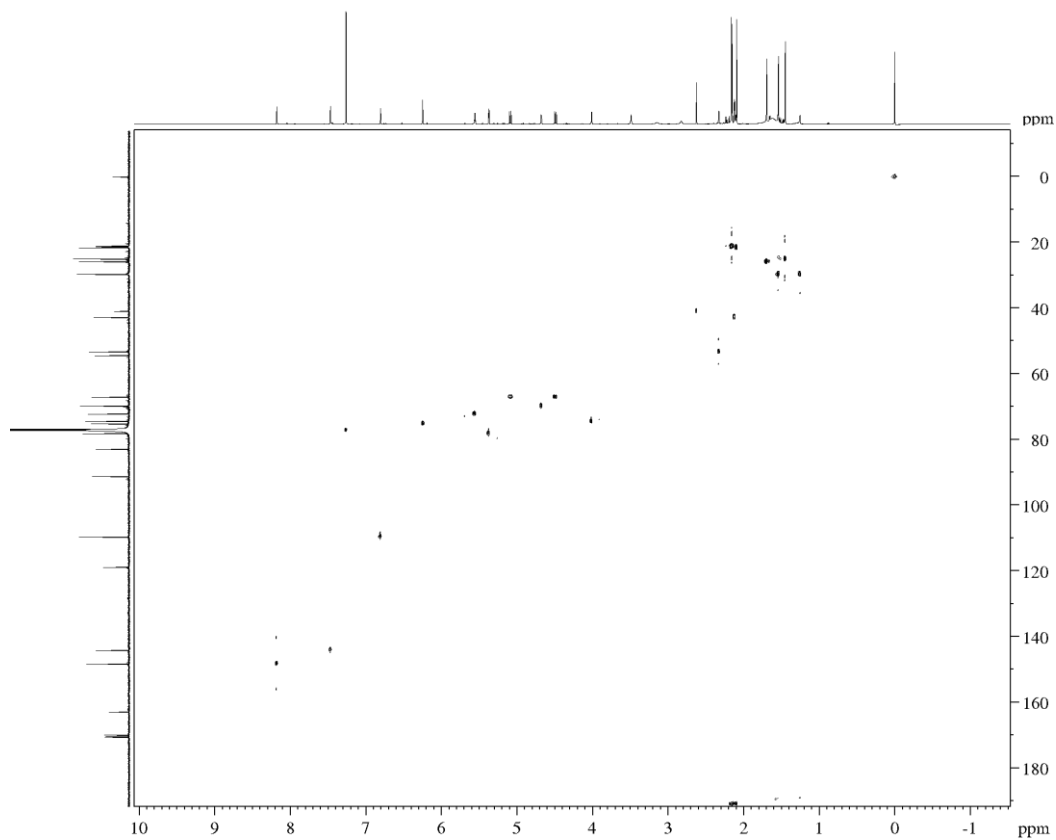

**Fig. S8.5** HSQC spectrum (600 MHz, CDCl<sub>3</sub>) of compound **8**

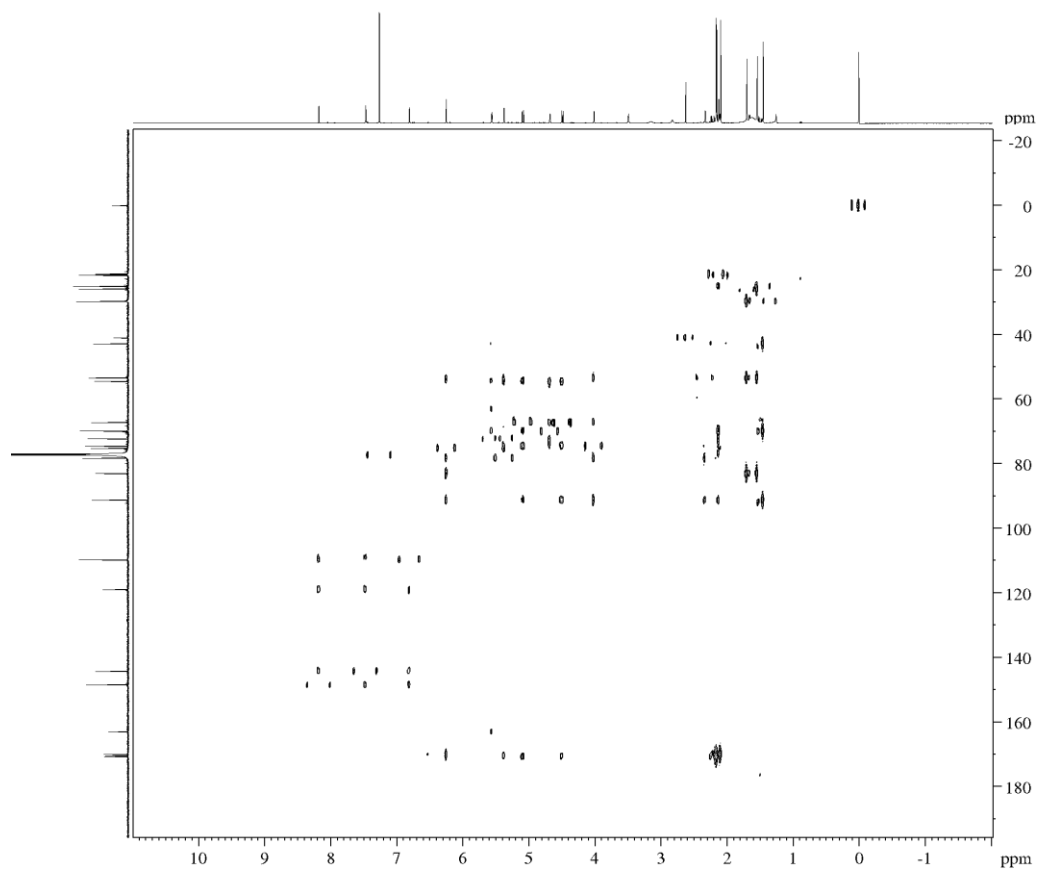

**Fig. S8.6** HMBC spectrum (600 MHz, CDCl<sub>3</sub>) of compound **1**

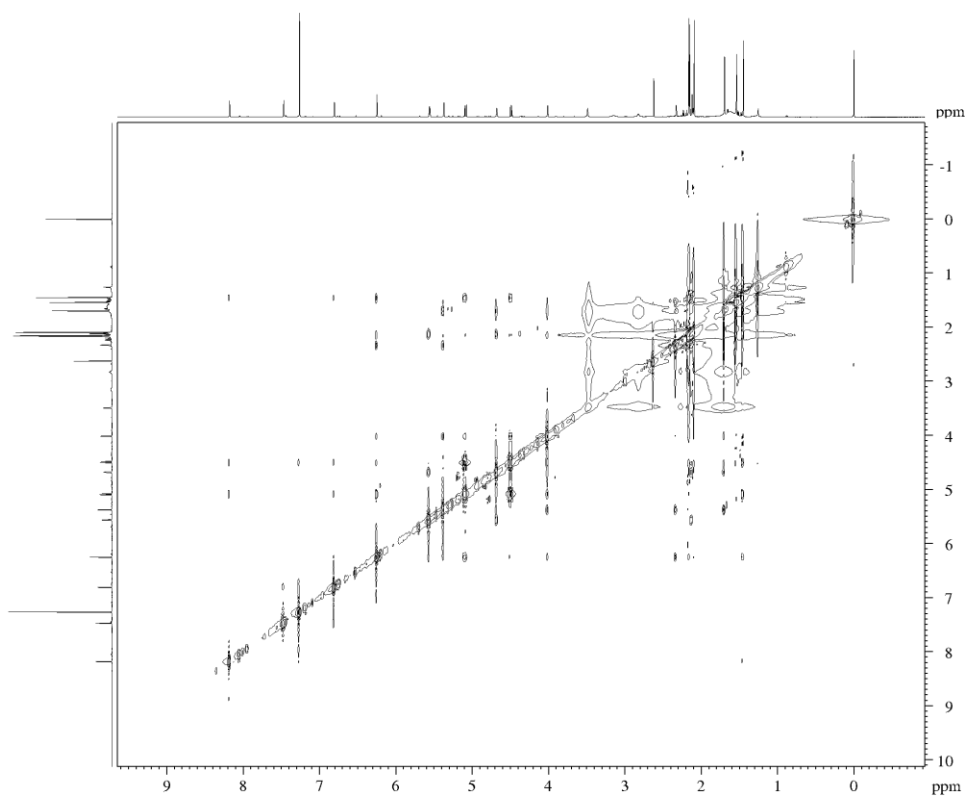

**Fig. S8.7** NOESY spectrum (600 MHz,  $\text{CDCl}_3$ ) of compound **8**

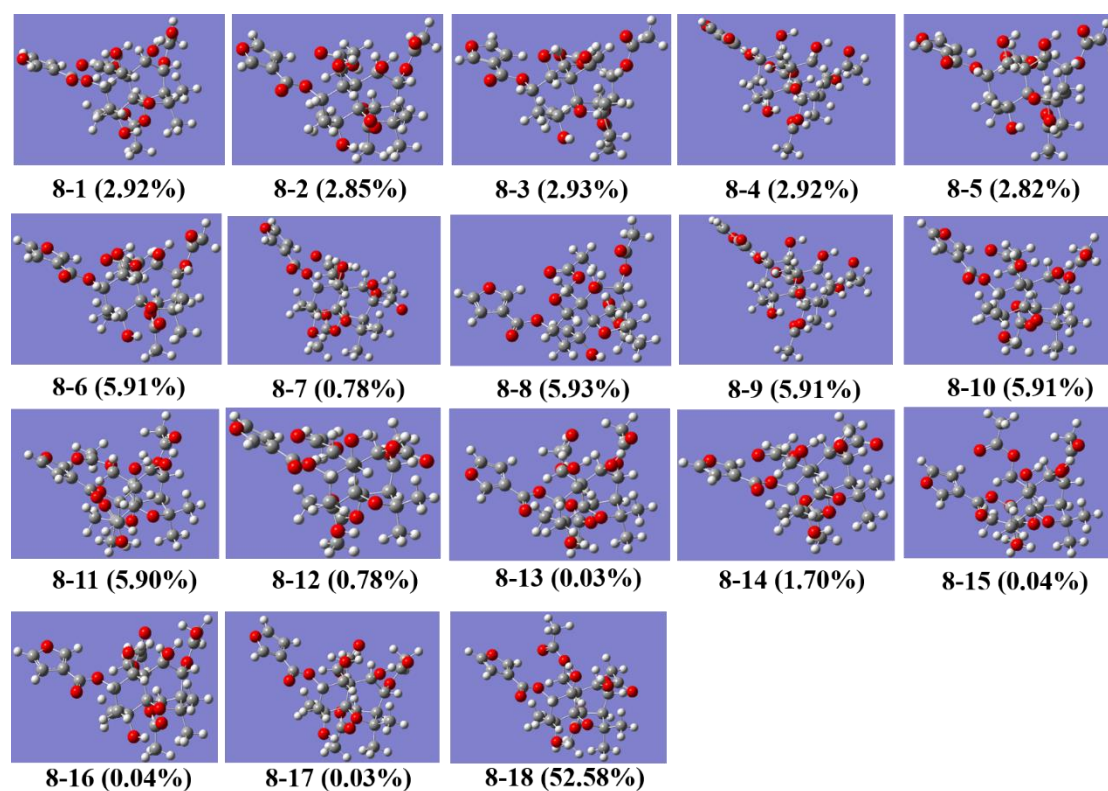

**Fig. S8.8** Most stable conformers of **8** in solvated model calculations at the B3LYP/6-311++G (2d, p) level in ECD calculation

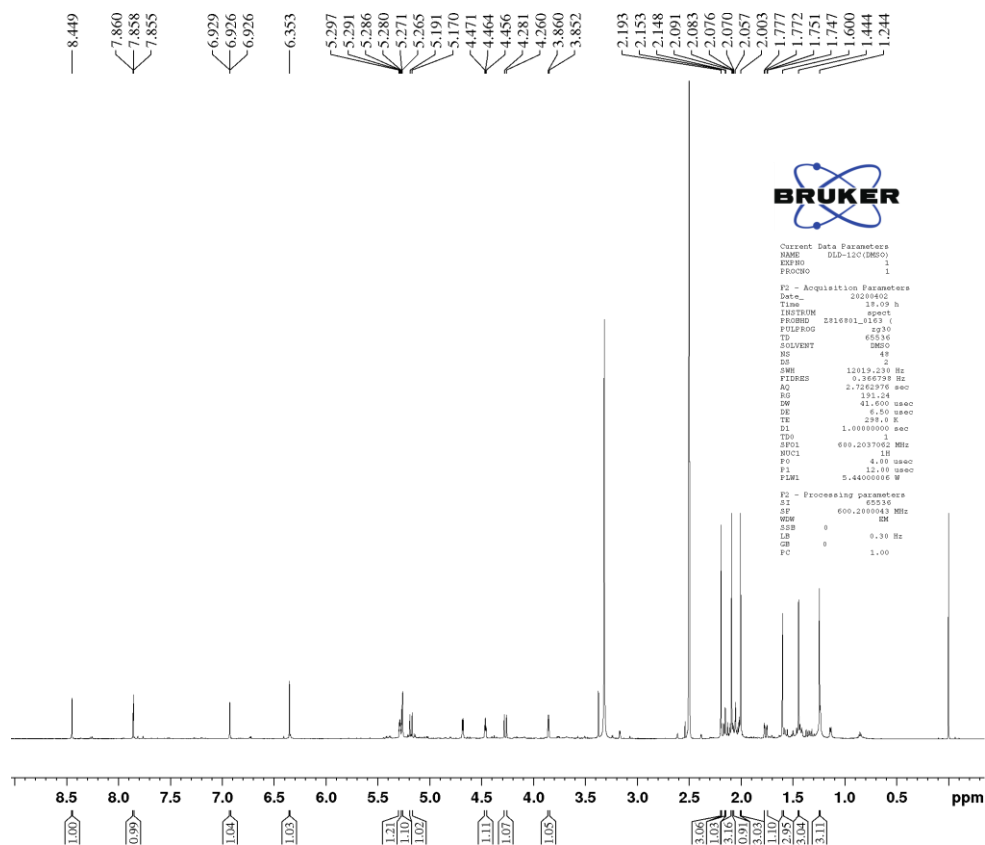

Fig. S8.9  $^1\text{H}$  NMR spectrum (600 MHz, DMSO) of compound **8**

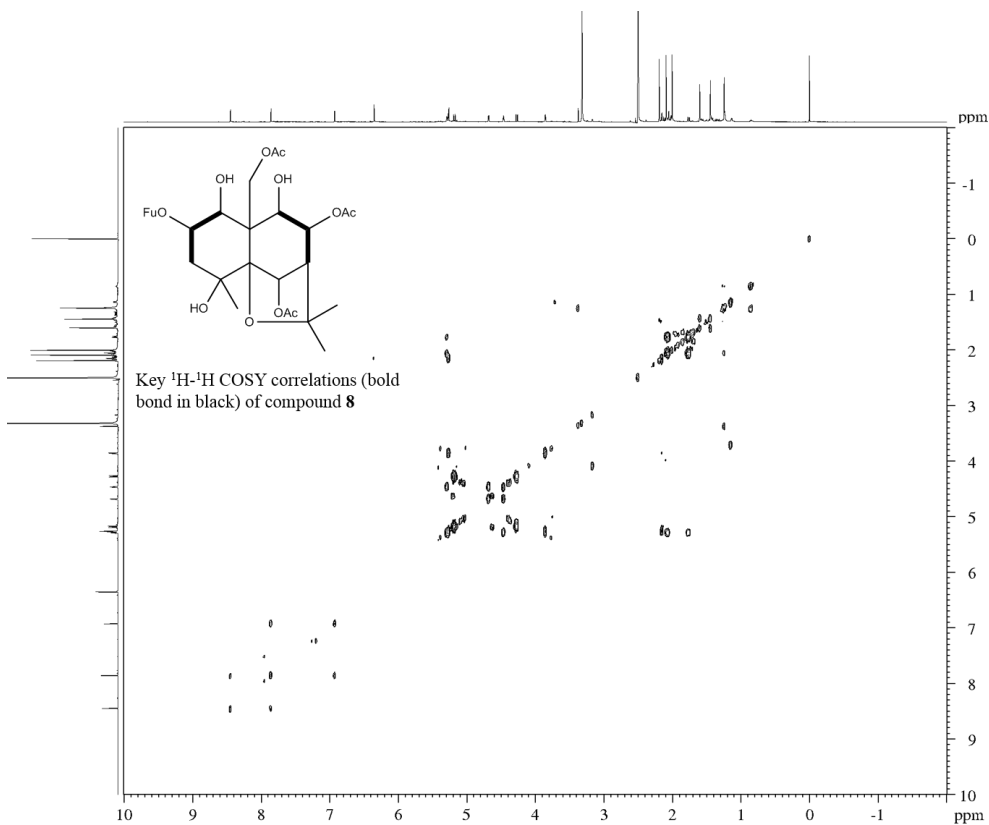

Fig. S8.10  $^1\text{H}$ - $^1\text{H}$  COSY spectrum (600 MHz, DMSO) of compound **8**
